# Supplementary material
Source: PubMed Central journal article supplement (PMC1838628)
Supplement: pnas_0611557104_1.pdf [file pnas_0611557104_1.pdf]

345 representative taxa

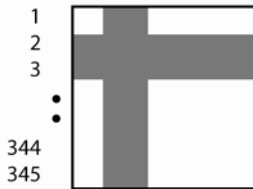

Recalculation of distance matrix from branch length

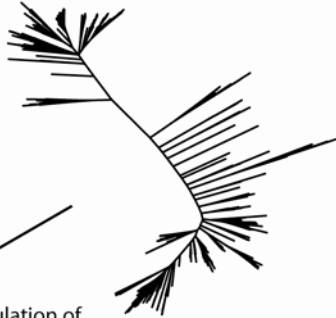

4th taxonomic range

Collapsing distance matrix by averaging same taxonomic group

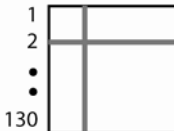

Building a tree by NJ method

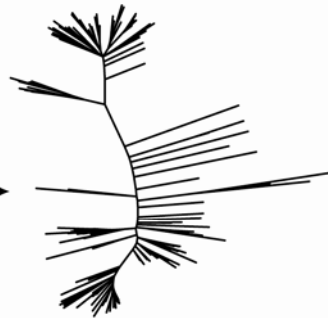

Collapsing

3rd taxonomic range

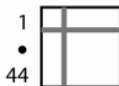

Building a tree by NJ method

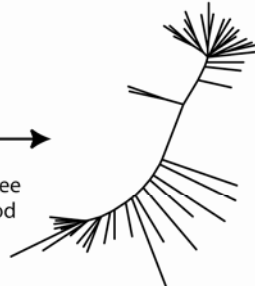

2nd taxonomic range
