# Supplementary material
Source: PubMed Central journal article supplement (PMC1838628)
Supplement: pnas_0611557104_2.pdf [file pnas_0611557104_2.pdf]

Table 1. List of HGT candidates at various taxonomic ranges. The binary digit (1 for true or 0 for false) indicates the occurrence of HGT detected at a given taxonomic range.

| Pfam id | Pfam name       | Taxonomic range |     |     |
|---------|-----------------|-----------------|-----|-----|
|         |                 | 2nd             | 3rd | 4th |
| PF00008 | EGF             | 0               | 1   | 1   |
| PF00010 | HLH             | 0               | 1   | 1   |
| PF00014 | Kunitz_BPTI     | 0               | 0   | 1   |
| PF00017 | SH2             | 0               | 1   | 1   |
| PF00022 | Actin           | 1               | 1   | 0   |
| PF00025 | Arf             | 0               | 1   | 1   |
| PF00026 | Asp             | 0               | 1   | 1   |
| PF00038 | Filament        | 0               | 1   | 1   |
| PF00045 | Hemopexin       | 0               | 0   | 1   |
| PF00046 | Homeobox        | 0               | 1   | 1   |
| PF00047 | ig              | 0               | 1   | 1   |
| PF00053 | Laminin_EGF     | 0               | 1   | 1   |
| PF00057 | Ldl_recept_a    | 0               | 1   | 1   |
| PF00063 | Myosin_head     | 0               | 1   | 0   |
| PF00077 | RVP             | 0               | 0   | 1   |
| PF00097 | zf-C3HC4        | 1               | 1   | 0   |
| PF00098 | zf-CCHC         | 0               | 1   | 1   |
| PF00110 | wnt             | 0               | 1   | 1   |
| PF00125 | Histone         | 1               | 0   | 0   |
| PF00130 | C1_1            | 0               | 1   | 1   |
| PF00134 | Cyclin_N        | 1               | 1   | 1   |
| PF00153 | Mito_carr       | 1               | 1   | 1   |
| PF00157 | Pou             | 0               | 0   | 1   |
| PF00168 | C2              | 0               | 1   | 1   |
| PF00169 | PH              | 0               | 1   | 1   |
| PF00170 | bZIP_1          | 0               | 1   | 1   |
| PF00179 | UQ_con          | 1               | 1   | 0   |
| PF00191 | Annexin         | 0               | 1   | 1   |
| PF00207 | A2M             | 0               | 0   | 1   |
| PF00223 | PsaA_PsaB       | 1               | 0   | 0   |
| PF00225 | Kinesin         | 1               | 1   | 1   |
| PF00233 | PDEase_I        | 0               | 1   | 1   |
| PF00235 | Profilin        | 0               | 1   | 1   |
| PF00240 | ubiquitin       | 1               | 1   | 1   |
| PF00241 | Cofilin_ADF     | 0               | 1   | 1   |
| PF00244 | 14-3-3          | 0               | 1   | 1   |
| PF00249 | Myb_DNA-binding | 1               | 1   | 0   |
| PF00250 | Fork_head       | 0               | 1   | 1   |
| PF00262 | Calreticulin    | 0               | 1   | 1   |
| PF00292 | PAX             | 0               | 1   | 1   |
| PF00302 | CAT             | 0               | 1   | 1   |
| PF00307 | CH              | 0               | 1   | 1   |
| PF00309 | Sigma54_AID     | 0               | 1   | 1   |
| PF00311 | PEPcase         | 1               | 0   | 0   |
| PF00319 | SRF-TF          | 0               | 1   | 1   |
| PF00320 | GATA            | 0               | 1   | 1   |
| PF00335 | Tetraspannin    | 0               | 0   | 1   |
| PF00339 | Arrestin_N      | 0               | 0   | 1   |

|         |                 |   |   |   |
|---------|-----------------|---|---|---|
| PF00349 | Hexokinase_1    | 0 | 1 | 1 |
| PF00353 | HemolysinCabind | 0 | 1 | 1 |
| PF00356 | LacI            | 0 | 1 | 1 |
| PF00358 | PTS_EIIA_1      | 0 | 1 | 0 |
| PF00367 | PTS_EIIB        | 0 | 1 | 0 |
| PF00373 | Band_41         | 0 | 1 | 1 |
| PF00381 | PTS-HPr         | 1 | 1 | 0 |
| PF00385 | Chromo          | 0 | 1 | 1 |
| PF00388 | PI-PLC-X        | 0 | 1 | 0 |
| PF00395 | SLH             | 0 | 1 | 1 |
| PF00397 | WW              | 0 | 1 | 1 |
| PF00431 | CUB             | 0 | 0 | 1 |
| PF00433 | Pkinase_C       | 0 | 1 | 1 |
| PF00435 | Spectrin        | 0 | 1 | 1 |
| PF00439 | Bromodomain     | 0 | 1 | 1 |
| PF00443 | UCH             | 0 | 1 | 1 |
| PF00447 | HSF_DNA-bind    | 0 | 1 | 1 |
| PF00503 | G-alpha         | 0 | 1 | 1 |
| PF00504 | Chloroa_b-bind  | 1 | 1 | 1 |
| PF00505 | HMG_box         | 0 | 1 | 1 |
| PF00514 | Arm             | 0 | 1 | 1 |
| PF00532 | Peripla_BP_1    | 1 | 1 | 1 |
| PF00556 | LHC             | 0 | 0 | 1 |
| PF00566 | TBC             | 0 | 1 | 0 |
| PF00569 | ZZ              | 0 | 1 | 1 |
| PF00577 | Usher           | 0 | 0 | 1 |
| PF00611 | FCH             | 0 | 0 | 1 |
| PF00613 | PI3Ka           | 0 | 1 | 1 |
| PF00615 | RGS             | 0 | 0 | 1 |
| PF00616 | RasGAP          | 0 | 0 | 1 |
| PF00617 | RasGEF          | 0 | 0 | 1 |
| PF00620 | RhoGAP          | 0 | 0 | 1 |
| PF00621 | RhoGEF          | 0 | 1 | 1 |
| PF00622 | SPRY            | 0 | 1 | 1 |
| PF00626 | Gelsolin        | 0 | 1 | 1 |
| PF00628 | PHD             | 0 | 1 | 1 |
| PF00630 | Filamin         | 0 | 1 | 1 |
| PF00632 | HECT            | 0 | 1 | 1 |
| PF00635 | Motile_Sperm    | 0 | 1 | 1 |
| PF00637 | Clathrin        | 0 | 0 | 1 |
| PF00638 | Ran_BP1         | 0 | 1 | 0 |
| PF00642 | zf-CCCH         | 0 | 1 | 0 |
| PF00647 | EF1G            | 0 | 0 | 1 |
| PF00650 | CRAL_TRIO       | 0 | 1 | 1 |
| PF00658 | PABP            | 0 | 0 | 1 |
| PF00659 | POLO_box        | 0 | 0 | 1 |
| PF00735 | GTP_CDC         | 0 | 0 | 1 |
| PF00741 | Gas_vesicle     | 0 | 0 | 1 |
| PF00768 | Peptidase_S11   | 0 | 1 | 1 |
| PF00775 | Dioxygenase_C   | 0 | 1 | 0 |
| PF00780 | CNH             | 0 | 0 | 1 |

|         |                 |   |   |   |
|---------|-----------------|---|---|---|
| PF00786 | PBD             | 0 | 0 | 1 |
| PF00787 | PX              | 0 | 1 | 1 |
| PF00789 | UBX             | 0 | 0 | 1 |
| PF00792 | PI3K_C2         | 0 | 0 | 1 |
| PF00804 | Syntaxin        | 0 | 1 | 1 |
| PF00806 | PUF             | 0 | 1 | 1 |
| PF00810 | ER_lumen_recept | 0 | 1 | 1 |
| PF00825 | Ribonuclease_P  | 1 | 1 | 1 |
| PF00828 | Ribosomal_L18e  | 0 | 1 | 1 |
| PF00838 | TCTP            | 0 | 1 | 1 |
| PF00848 | Ring_hydroxyl_A | 0 | 0 | 1 |
| PF00866 | Ring_hydroxyl_B | 0 | 0 | 1 |
| PF00871 | Acetate_kinase  | 1 | 1 | 1 |
| PF00888 | Cullin          | 0 | 0 | 1 |
| PF00895 | ATP-synt_8      | 0 | 0 | 1 |
| PF00917 | MATH            | 0 | 0 | 1 |
| PF00928 | Adap_comp_sub   | 0 | 1 | 1 |
| PF00932 | IF_tail         | 0 | 1 | 0 |
| PF00940 | RNA_pol         | 1 | 0 | 0 |
| PF00956 | NAP             | 0 | 1 | 1 |
| PF00957 | Synaptobrevin   | 0 | 1 | 1 |
| PF00995 | Sec1            | 0 | 1 | 1 |
| PF00996 | GDI             | 0 | 1 | 1 |
| PF01031 | Dynamin_M       | 0 | 1 | 1 |
| PF01059 | Oxidored_q5_N   | 0 | 0 | 1 |
| PF01067 | Calpain_III     | 0 | 0 | 1 |
| PF01075 | Glyco_transf_9  | 1 | 1 | 1 |
| PF01076 | Mob_Pre         | 0 | 1 | 1 |
| PF01079 | Hint            | 0 | 0 | 1 |
| PF01081 | Aldolase        | 1 | 1 | 1 |
| PF01105 | EMP24_GP25L     | 0 | 1 | 1 |
| PF01111 | CKS             | 0 | 1 | 1 |
| PF01125 | G10             | 0 | 1 | 1 |
| PF01150 | GDA1_CD39       | 0 | 1 | 1 |
| PF01158 | Ribosomal_L36e  | 0 | 1 | 1 |
| PF01159 | Ribosomal_L6e   | 0 | 0 | 1 |
| PF01213 | CAP             | 0 | 1 | 1 |
| PF01214 | CK_II_beta      | 0 | 0 | 1 |
| PF01217 | Clat_adaptor_s  | 0 | 1 | 1 |
| PF01219 | DAGK_prokar     | 0 | 1 | 1 |
| PF01220 | DHquinase_II    | 1 | 1 | 0 |
| PF01221 | Dynein_light    | 0 | 1 | 1 |
| PF01233 | NMT             | 0 | 1 | 1 |
| PF01235 | Na_Ala_symp     | 1 | 0 | 0 |
| PF01237 | Oxysterol_BP    | 0 | 0 | 1 |
| PF01239 | PPTA            | 0 | 1 | 1 |
| PF01249 | Ribosomal_S21e  | 0 | 1 | 1 |
| PF01251 | Ribosomal_S7e   | 0 | 1 | 1 |
| PF01258 | zf-dskA_traR    | 0 | 1 | 1 |
| PF01270 | Glyco_hydro_8   | 0 | 0 | 1 |
| PF01272 | GreA_GreB       | 1 | 1 | 1 |

|         |                 |   |   |   |
|---------|-----------------|---|---|---|
| PF01276 | OKR_DC_1        | 0 | 1 | 1 |
| PF01283 | Ribosomal_S26e  | 0 | 1 | 1 |
| PF01290 | Thymosin        | 0 | 0 | 1 |
| PF01294 | Ribosomal_L13e  | 0 | 1 | 0 |
| PF01302 | CAP_GLY         | 0 | 0 | 1 |
| PF01316 | Arg_repressor   | 0 | 1 | 1 |
| PF01330 | RuvA_N          | 1 | 1 | 1 |
| PF01331 | mRNA_cap_enzyme | 0 | 1 | 1 |
| PF01363 | FYVE            | 0 | 1 | 1 |
| PF01386 | Ribosomal_L25p  | 1 | 1 | 1 |
| PF01388 | ARID            | 0 | 0 | 1 |
| PF01399 | PCI             | 1 | 1 | 1 |
| PF01412 | ArfGap          | 0 | 1 | 0 |
| PF01418 | HTH_6           | 0 | 1 | 1 |
| PF01427 | Peptidase_M15   | 0 | 1 | 1 |
| PF01446 | Rep_1           | 0 | 1 | 0 |
| PF01459 | Porin_3         | 0 | 1 | 1 |
| PF01466 | Skp1            | 0 | 1 | 1 |
| PF01471 | PG_binding_1    | 0 | 1 | 1 |
| PF01485 | IBR             | 0 | 0 | 1 |
| PF01504 | PIP5K           | 0 | 0 | 1 |
| PF01515 | PTA_PTB         | 1 | 0 | 0 |
| PF01526 | Transposase_7   | 0 | 1 | 1 |
| PF01529 | zf-DHHC         | 0 | 1 | 1 |
| PF01532 | Glyco_hydro_47  | 0 | 0 | 1 |
| PF01535 | PPR             | 0 | 1 | 1 |
| PF01536 | SAM_decarbox    | 0 | 0 | 1 |
| PF01548 | Transposase_9   | 1 | 1 | 1 |
| PF01585 | G-patch         | 0 | 1 | 1 |
| PF01591 | 6PF2K           | 0 | 0 | 1 |
| PF01599 | Ribosomal_S27   | 1 | 0 | 0 |
| PF01602 | Adaptin_N       | 1 | 1 | 1 |
| PF01603 | B56             | 0 | 0 | 1 |
| PF01607 | CBM_14          | 0 | 0 | 1 |
| PF01610 | Transposase_12  | 1 | 1 | 0 |
| PF01628 | HrcA            | 0 | 1 | 0 |
| PF01643 | Acyl-ACP_TE     | 0 | 0 | 1 |
| PF01644 | Chitin_synth_1  | 0 | 0 | 1 |
| PF01650 | Peptidase_C13   | 0 | 1 | 1 |
| PF01652 | IF4E            | 0 | 1 | 1 |
| PF01689 | Hyratase_decarb | 0 | 0 | 1 |
| PF01726 | LexA_DNA_bind   | 0 | 1 | 1 |
| PF01733 | Nucleoside_tran | 0 | 1 | 1 |
| PF01749 | IBB             | 0 | 1 | 1 |
| PF01753 | zf-MYND         | 0 | 1 | 1 |
| PF01759 | NTR             | 0 | 0 | 1 |
| PF01775 | Ribosomal_L18ae | 0 | 1 | 1 |
| PF01777 | Ribosomal_L27e  | 0 | 1 | 1 |
| PF01779 | Ribosomal_L29e  | 0 | 0 | 1 |
| PF01781 | Ribosomal_L38e  | 0 | 0 | 1 |
| PF01816 | LRV             | 0 | 0 | 1 |

|         |               |   |   |   |
|---------|---------------|---|---|---|
| PF01843 | DIL           | 0 | 1 | 1 |
| PF01849 | NAC           | 1 | 1 | 1 |
| PF01851 | PC_rep        | 0 | 1 | 1 |
| PF01853 | MOZ_SAS       | 0 | 1 | 1 |
| PF01884 | PcrB          | 0 | 1 | 0 |
| PF01908 | DUF75         | 0 | 1 | 0 |
| PF01946 | Thi4          | 0 | 1 | 1 |
| PF01949 | DUF99         | 0 | 1 | 1 |
| PF01981 | UPF0099       | 0 | 1 | 1 |
| PF01982 | DUF120        | 0 | 1 | 1 |
| PF02005 | TRM           | 0 | 1 | 1 |
| PF02020 | W2            | 0 | 0 | 1 |
| PF02028 | BCCT          | 0 | 1 | 1 |
| PF02045 | CBFB_NFYA     | 0 | 0 | 1 |
| PF02056 | Glyco_hydro_4 | 0 | 0 | 1 |
| PF02071 | NSF           | 0 | 1 | 1 |
| PF02075 | RuvC          | 1 | 1 | 1 |
| PF02109 | DAD           | 0 | 0 | 1 |
| PF02114 | Phosducin     | 0 | 0 | 1 |
| PF02115 | Rho_GDI       | 0 | 0 | 1 |
| PF02120 | Flg_hook      | 0 | 1 | 1 |
| PF02129 | Peptidase_S15 | 0 | 1 | 1 |
| PF02134 | UBACT         | 0 | 1 | 1 |
| PF02138 | Beach         | 0 | 0 | 1 |
| PF02154 | FliM          | 0 | 1 | 1 |
| PF02162 | XYPPX         | 0 | 1 | 1 |
| PF02170 | PAZ           | 0 | 1 | 1 |
| PF02181 | FH2           | 0 | 0 | 1 |
| PF02197 | RIIa          | 0 | 1 | 1 |
| PF02207 | zf-UBR1       | 0 | 0 | 1 |
| PF02212 | GED           | 0 | 1 | 1 |
| PF02214 | K_tetra       | 0 | 1 | 1 |
| PF02239 | Cytochrom_D1  | 0 | 0 | 1 |
| PF02255 | PTS_IIA       | 0 | 0 | 1 |
| PF02259 | FAT           | 0 | 1 | 1 |
| PF02260 | FATC          | 0 | 1 | 1 |
| PF02269 | TFIID-18kDa   | 0 | 0 | 1 |
| PF02278 | Lyase_8       | 0 | 0 | 1 |
| PF02283 | CobU          | 0 | 1 | 1 |
| PF02291 | TFIID-31kDa   | 0 | 0 | 1 |
| PF02301 | HORMA         | 0 | 0 | 1 |
| PF02302 | PTS_IIB       | 0 | 0 | 1 |
| PF02311 | AraC_binding  | 0 | 1 | 0 |
| PF02326 | YMF19         | 0 | 0 | 1 |
| PF02330 | MAM33         | 0 | 0 | 1 |
| PF02338 | OTU           | 0 | 1 | 1 |
| PF02342 | TerD          | 0 | 0 | 1 |
| PF02359 | CDC48_N       | 1 | 1 | 1 |
| PF02369 | Big_1         | 0 | 0 | 1 |
| PF02378 | PTS_EIIC      | 0 | 1 | 0 |
| PF02379 | PTS_IIB fruc  | 0 | 1 | 1 |

|         |                 |   |   |   |
|---------|-----------------|---|---|---|
| PF02381 | UPF0040         | 0 | 1 | 0 |
| PF02383 | Syja_N          | 0 | 1 | 1 |
| PF02384 | N6_Mtase        | 1 | 0 | 0 |
| PF02397 | Bac_transf      | 1 | 1 | 1 |
| PF02435 | Glyco_hydro_68  | 0 | 0 | 1 |
| PF02450 | LACT            | 0 | 0 | 1 |
| PF02452 | PemK            | 0 | 1 | 1 |
| PF02460 | Patched         | 0 | 1 | 1 |
| PF02466 | Tim17           | 0 | 0 | 1 |
| PF02498 | Bro-N           | 0 | 0 | 1 |
| PF02506 | Methylase_M     | 1 | 0 | 0 |
| PF02508 | Rnf-Nqr         | 0 | 1 | 1 |
| PF02516 | STT3            | 0 | 1 | 1 |
| PF02522 | Antibiotic_NAT  | 0 | 0 | 1 |
| PF02534 | TraG            | 0 | 1 | 1 |
| PF02544 | Steroid_dh      | 0 | 1 | 1 |
| PF02557 | VanY            | 0 | 1 | 1 |
| PF02559 | CarD_TRCF       | 1 | 1 | 1 |
| PF02575 | DUF149          | 1 | 0 | 0 |
| PF02583 | DUF156          | 0 | 1 | 0 |
| PF02588 | DUF161          | 0 | 1 | 1 |
| PF02591 | DUF164          | 1 | 1 | 1 |
| PF02595 | Gly_kinase      | 0 | 1 | 0 |
| PF02599 | CsrA            | 0 | 1 | 1 |
| PF02601 | Exonuc_VII_L    | 1 | 1 | 1 |
| PF02604 | PhdYeFM         | 1 | 1 | 1 |
| PF02610 | Arabinose_Isome | 0 | 0 | 1 |
| PF02613 | Nitrate_red_del | 0 | 1 | 0 |
| PF02614 | UxaC            | 0 | 1 | 1 |
| PF02618 | ADC_lyase       | 1 | 1 | 1 |
| PF02623 | DUF180          | 0 | 0 | 1 |
| PF02625 | XdhC_CoxI       | 0 | 1 | 0 |
| PF02631 | RecX            | 1 | 1 | 1 |
| PF02632 | BioY            | 1 | 0 | 0 |
| PF02638 | DUF187          | 0 | 1 | 1 |
| PF02645 | DegV            | 0 | 1 | 1 |
| PF02650 | DUF199          | 0 | 0 | 1 |
| PF02664 | LuxS            | 0 | 1 | 0 |
| PF02674 | Colicin_V       | 0 | 1 | 1 |
| PF02680 | DUF211          | 0 | 0 | 1 |
| PF02681 | DUF212          | 0 | 1 | 1 |
| PF02694 | UPF0060         | 0 | 0 | 1 |
| PF02702 | KdpD            | 0 | 1 | 1 |
| PF02719 | Polysacc_synt_2 | 1 | 1 | 1 |
| PF02731 | SKIP_SNW        | 0 | 0 | 1 |
| PF02732 | ERCC4           | 0 | 1 | 1 |
| PF02736 | Myosin_N        | 0 | 1 | 1 |
| PF02752 | Arrestin_C      | 0 | 0 | 1 |
| PF02799 | NMT_C           | 0 | 1 | 1 |
| PF02807 | ATP-gua_PtransN | 0 | 1 | 1 |
| PF02809 | UIM             | 0 | 1 | 1 |

|         |                 |   |   |   |
|---------|-----------------|---|---|---|
| PF02814 | UreE_N          | 0 | 1 | 1 |
| PF02815 | MIR             | 0 | 1 | 1 |
| PF02854 | MIF4G           | 0 | 1 | 1 |
| PF02863 | Arg_repressor_C | 0 | 1 | 1 |
| PF02889 | Sec63           | 0 | 1 | 1 |
| PF02891 | zf-MIZ          | 0 | 1 | 1 |
| PF02909 | TetR_C          | 0 | 0 | 1 |
| PF02953 | zf-Tim10_DDP    | 0 | 0 | 1 |
| PF02965 | Met_synt_B12    | 1 | 0 | 0 |
| PF02966 | DIM1            | 0 | 0 | 1 |
| PF02970 | TBCA            | 0 | 0 | 1 |
| PF02976 | MutH            | 0 | 0 | 1 |
| PF02984 | Cyclin_C        | 0 | 1 | 1 |
| PF02991 | MAP1_LC3        | 0 | 1 | 1 |
| PF03028 | Dynein_heavy    | 0 | 1 | 1 |
| PF03031 | NIF             | 0 | 1 | 1 |
| PF03095 | PTPA            | 0 | 0 | 1 |
| PF03105 | SPX             | 0 | 1 | 1 |
| PF03116 | NQR2_RnfD_RnfE  | 0 | 1 | 1 |
| PF03124 | EXS             | 0 | 0 | 1 |
| PF03133 | TTL             | 0 | 0 | 1 |
| PF03134 | TB2_DP1_HVA22   | 0 | 0 | 1 |
| PF03151 | DUF250          | 0 | 0 | 1 |
| PF03152 | UFD1            | 0 | 1 | 1 |
| PF03159 | XRN_N           | 0 | 1 | 1 |
| PF03165 | MH1             | 0 | 0 | 1 |
| PF03178 | CPSF_A          | 0 | 0 | 1 |
| PF03179 | V-ATPase_G      | 0 | 0 | 1 |
| PF03180 | Lipoprotein_9   | 1 | 0 | 0 |
| PF03194 | LUC7            | 0 | 0 | 1 |
| PF03199 | GSH_synthase    | 0 | 0 | 1 |
| PF03206 | NifW            | 0 | 0 | 1 |
| PF03223 | V-ATPase_C      | 0 | 0 | 1 |
| PF03248 | Rer1            | 0 | 0 | 1 |
| PF03256 | APC10           | 0 | 0 | 1 |
| PF03270 | DUF269          | 0 | 1 | 1 |
| PF03271 | EB1             | 0 | 1 | 1 |
| PF03275 | GLF             | 0 | 1 | 0 |
| PF03291 | Pox_MCEL        | 0 | 0 | 1 |
| PF03313 | SDH_alpha       | 1 | 1 | 0 |
| PF03315 | SDH_beta        | 1 | 1 | 0 |
| PF03320 | FBPase_glpX     | 0 | 1 | 1 |
| PF03349 | Toluene_X       | 0 | 1 | 1 |
| PF03371 | PRP38           | 0 | 0 | 1 |
| PF03381 | CDC50           | 0 | 1 | 1 |
| PF03389 | MobA_MobL       | 0 | 0 | 1 |
| PF03399 | SAC3_GANP       | 0 | 0 | 1 |
| PF03401 | Bug             | 0 | 0 | 1 |
| PF03413 | PepSY           | 1 | 0 | 0 |
| PF03416 | Peptidase_C54   | 0 | 0 | 1 |
| PF03448 | MgtE_N          | 1 | 1 | 1 |



|         |                 |   |   |   |
|---------|-----------------|---|---|---|
| PF03449 | GreA_GreB_N     | 1 | 1 | 1 |
| PF03461 | TRCF            | 1 | 1 | 1 |
| PF03475 | 3-alpha         | 0 | 0 | 1 |
| PF03480 | SBP_bac_7       | 0 | 1 | 1 |
| PF03501 | S10_pectin      | 0 | 1 | 1 |
| PF03550 | LolB            | 0 | 0 | 1 |
| PF03556 | DUF298          | 0 | 0 | 1 |
| PF03588 | Leu_Phe_trans   | 0 | 1 | 1 |
| PF03593 | Nuclear_move    | 0 | 1 | 0 |
| PF03594 | BenE            | 0 | 0 | 1 |
| PF03601 | Cons_hypoth698  | 0 | 1 | 0 |
| PF03604 | DNA_RNApol_7kD  | 0 | 0 | 1 |
| PF03605 | DcuA_DcuB       | 0 | 0 | 1 |
| PF03606 | DcuC            | 0 | 1 | 0 |
| PF03608 | EII-GUT         | 0 | 0 | 1 |
| PF03610 | EIIA-man        | 0 | 1 | 1 |
| PF03611 | EIIC-GAT        | 0 | 0 | 1 |
| PF03612 | EIIBC-GUT_N     | 0 | 0 | 1 |
| PF03618 | DUF299          | 0 | 1 | 1 |
| PF03637 | Mob1_phocein    | 0 | 0 | 1 |
| PF03643 | Vps26           | 0 | 0 | 1 |
| PF03645 | Tctex-1         | 0 | 1 | 1 |
| PF03668 | ATP_bind_2      | 0 | 1 | 0 |
| PF03672 | UPF0154         | 0 | 0 | 1 |
| PF03680 | UPF0148         | 0 | 0 | 1 |
| PF03681 | UPF0150         | 1 | 0 | 0 |
| PF03693 | UPF0156         | 0 | 0 | 1 |
| PF03699 | UPF0182         | 0 | 1 | 0 |
| PF03704 | BTAD            | 0 | 1 | 1 |
| PF03707 | MHYT            | 0 | 0 | 1 |
| PF03710 | GlnE            | 0 | 0 | 1 |
| PF03711 | OKR_DC_1_C      | 0 | 1 | 1 |
| PF03713 | DUF305          | 0 | 0 | 1 |
| PF03714 | PUD             | 0 | 0 | 1 |
| PF03727 | Hexokinase_2    | 0 | 1 | 1 |
| PF03731 | Ku_N            | 0 | 0 | 1 |
| PF03734 | ErfK_YbiS_YhnG  | 0 | 1 | 1 |
| PF03738 | GSP_synth       | 0 | 0 | 1 |
| PF03739 | YjgP_YjgQ       | 0 | 1 | 1 |
| PF03741 | TerC            | 1 | 1 | 0 |
| PF03765 | CRAL_TRIO_N     | 0 | 1 | 1 |
| PF03770 | IPK             | 0 | 1 | 1 |
| PF03780 | DUF322          | 0 | 0 | 1 |
| PF03783 | CsgG            | 0 | 0 | 1 |
| PF03786 | UxuA            | 0 | 0 | 1 |
| PF03793 | PASTA           | 1 | 0 | 0 |
| PF03798 | LAG1            | 0 | 1 | 1 |
| PF03799 | FtsQ            | 0 | 1 | 1 |
| PF03806 | ABG_transport   | 0 | 0 | 1 |
| PF03808 | Glyco_tran_WecB | 0 | 1 | 1 |
| PF03810 | IBN_N           | 0 | 0 | 1 |

|         |                 |   |   |   |
|---------|-----------------|---|---|---|
| PF03816 | LytR_cpsA_psr   | 0 | 1 | 1 |
| PF03828 | PAP_assoc       | 0 | 0 | 1 |
| PF03829 | PTSIIA_gutA     | 0 | 0 | 1 |
| PF03834 | Rad10           | 0 | 0 | 1 |
| PF03835 | Rad4            | 0 | 0 | 1 |
| PF03837 | RecT            | 0 | 1 | 1 |
| PF03850 | Tfb4            | 0 | 0 | 1 |
| PF03860 | DUF326          | 0 | 0 | 1 |
| PF03861 | ANTAR           | 0 | 1 | 0 |
| PF03870 | RNA_pol_Rpb8    | 0 | 1 | 1 |
| PF03871 | RNA_pol_Rpb5_N  | 0 | 0 | 1 |
| PF03872 | RseA_N          | 0 | 0 | 1 |
| PF03878 | Hrf1            | 0 | 0 | 1 |
| PF03880 | DbpA            | 1 | 0 | 0 |
| PF03883 | DUF328          | 0 | 1 | 1 |
| PF03894 | XFP             | 0 | 1 | 0 |
| PF03901 | Glyco_transf_22 | 0 | 0 | 1 |
| PF03914 | CBF             | 0 | 0 | 1 |
| PF03917 | GSH_synth_ATP   | 0 | 0 | 1 |
| PF03919 | mRNA_cap_C      | 0 | 1 | 1 |
| PF03928 | DUF336          | 0 | 1 | 0 |
| PF03929 | PepSY_TM        | 0 | 1 | 1 |
| PF03939 | Ribosomal_L23eN | 0 | 1 | 1 |
| PF03960 | ArsC            | 1 | 1 | 1 |
| PF03961 | DUF342          | 0 | 0 | 1 |
| PF03965 | Pencillinase_R  | 0 | 1 | 1 |
| PF03968 | OstA            | 0 | 0 | 1 |
| PF03982 | DAGAT           | 0 | 0 | 1 |
| PF03998 | Utp11           | 0 | 0 | 1 |
| PF04006 | Mpp10           | 0 | 0 | 1 |
| PF04011 | LemA            | 1 | 0 | 0 |
| PF04013 | DUF358          | 0 | 0 | 1 |
| PF04018 | DUF368          | 1 | 0 | 0 |
| PF04020 | DUF360          | 0 | 0 | 1 |
| PF04025 | DUF370          | 0 | 0 | 1 |
| PF04028 | DUF374          | 0 | 0 | 1 |
| PF04031 | Las1            | 0 | 0 | 1 |
| PF04045 | P34-Arc         | 0 | 0 | 1 |
| PF04046 | PSP             | 0 | 0 | 1 |
| PF04051 | TRAPP_Bet3      | 0 | 1 | 1 |
| PF04056 | Ssl1            | 0 | 0 | 1 |
| PF04058 | DNA_pol_alpha_B | 0 | 0 | 1 |
| PF04062 | P21-Arc         | 0 | 0 | 1 |
| PF04077 | DsrH            | 0 | 0 | 1 |
| PF04078 | Rcd1            | 0 | 0 | 1 |
| PF04079 | DUF387          | 1 | 0 | 0 |
| PF04085 | MreC            | 1 | 1 | 1 |
| PF04086 | SRP-alpha_N     | 0 | 0 | 1 |
| PF04093 | MreD            | 0 | 0 | 1 |
| PF04099 | Sybindin        | 0 | 1 | 1 |
| PF04109 | APG9            | 0 | 0 | 1 |

|         |                |   |   |   |
|---------|----------------|---|---|---|
| PF04128 | Psf2           | 0 | 0 | 1 |
| PF04130 | Spc97_Spc98    | 0 | 0 | 1 |
| PF04131 | NanE           | 0 | 1 | 1 |
| PF04132 | Vps36          | 0 | 0 | 1 |
| PF04137 | ERO1           | 0 | 0 | 1 |
| PF04145 | Ctr            | 0 | 0 | 1 |
| PF04152 | Mre11_DNA_bind | 0 | 0 | 1 |
| PF04153 | NOT2_3_5       | 0 | 1 | 1 |
| PF04158 | Sof1           | 0 | 0 | 1 |
| PF04166 | PdxA           | 1 | 1 | 1 |
| PF04168 | DUF403         | 0 | 1 | 1 |
| PF04169 | DUF404         | 0 | 1 | 0 |
| PF04171 | DUF405         | 0 | 0 | 1 |
| PF04174 | DUF407         | 0 | 1 | 0 |
| PF04176 | TIP41          | 0 | 0 | 1 |
| PF04180 | LTV            | 0 | 0 | 1 |
| PF04183 | IucA_IucC      | 0 | 0 | 1 |
| PF04188 | DUF409         | 0 | 0 | 1 |
| PF04198 | Sugar-bind     | 0 | 1 | 1 |
| PF04204 | HTS            | 0 | 1 | 1 |
| PF04212 | MIT            | 0 | 0 | 1 |
| PF04215 | SgaT_UlaA      | 0 | 0 | 1 |
| PF04226 | Transgly_assoc | 0 | 1 | 1 |
| PF04228 | Zn_peptidase   | 0 | 0 | 1 |
| PF04231 | Endonuclease_1 | 0 | 0 | 1 |
| PF04234 | CopC           | 0 | 0 | 1 |
| PF04235 | DUF418         | 0 | 0 | 1 |
| PF04237 | DUF419         | 0 | 1 | 1 |
| PF04239 | DUF421         | 0 | 1 | 1 |
| PF04246 | RseC_MucC      | 0 | 0 | 1 |
| PF04248 | DUF427         | 0 | 0 | 1 |
| PF04257 | Exonuc_V_gamma | 0 | 0 | 1 |
| PF04258 | Peptidase_A22B | 0 | 1 | 1 |
| PF04261 | Dyp_perox      | 0 | 0 | 1 |
| PF04264 | YceI           | 0 | 1 | 1 |
| PF04271 | DnaD           | 0 | 0 | 1 |
| PF04279 | IspA           | 0 | 0 | 1 |
| PF04286 | DUF445         | 0 | 1 | 1 |
| PF04290 | DctQ           | 0 | 1 | 1 |
| PF04294 | VanW           | 0 | 0 | 1 |
| PF04296 | DUF448         | 0 | 1 | 1 |
| PF04298 | Zn_peptidase_2 | 0 | 0 | 1 |
| PF04303 | DUF453         | 0 | 0 | 1 |
| PF04327 | DUF464         | 0 | 0 | 1 |
| PF04332 | DUF475         | 0 | 0 | 1 |
| PF04341 | DUF485         | 0 | 1 | 1 |
| PF04349 | MdoG           | 0 | 0 | 1 |
| PF04357 | DUF490         | 0 | 1 | 1 |
| PF04362 | DUF495         | 0 | 0 | 1 |
| PF04371 | PAD_porph      | 0 | 1 | 1 |
| PF04375 | HemX           | 0 | 0 | 1 |

|         |                |   |   |   |
|---------|----------------|---|---|---|
| PF04381 | RdgC           | 0 | 0 | 1 |
| PF04386 | SspB           | 0 | 0 | 1 |
| PF04387 | PTPLA          | 0 | 1 | 1 |
| PF04390 | RplB           | 0 | 0 | 1 |
| PF04392 | DUF534         | 0 | 1 | 1 |
| PF04397 | LytTR          | 0 | 1 | 1 |
| PF04401 | DUF540         | 0 | 0 | 1 |
| PF04406 | TP6A_N         | 0 | 1 | 1 |
| PF04410 | Gar1           | 0 | 0 | 1 |
| PF04414 | DUF516         | 0 | 1 | 1 |
| PF04433 | SWIRM          | 0 | 0 | 1 |
| PF04438 | zf-HIT         | 0 | 0 | 1 |
| PF04453 | OstA_C         | 0 | 0 | 1 |
| PF04456 | DUF503         | 0 | 0 | 1 |
| PF04461 | DUF520         | 0 | 1 | 1 |
| PF04472 | DUF552         | 0 | 1 | 0 |
| PF04474 | DUF554         | 0 | 1 | 1 |
| PF04477 | DUF557         | 0 | 1 | 1 |
| PF04502 | DUF572         | 0 | 0 | 1 |
| PF04511 | DER1           | 0 | 1 | 1 |
| PF04524 | DUF586         | 0 | 1 | 1 |
| PF04547 | DUF590         | 0 | 0 | 1 |
| PF04564 | U-box          | 0 | 1 | 1 |
| PF04571 | Lipin_N        | 0 | 0 | 1 |
| PF04597 | Ribophorin_I   | 0 | 0 | 1 |
| PF04608 | PgpA           | 0 | 0 | 1 |
| PF04615 | Utp14          | 0 | 0 | 1 |
| PF04627 | ATP-synt_Eps   | 0 | 0 | 1 |
| PF04655 | APH_6_hur      | 0 | 0 | 1 |
| PF04657 | DUF606         | 0 | 1 | 1 |
| PF04658 | TAFII55_N      | 0 | 0 | 1 |
| PF04670 | Gtr1_RagA      | 0 | 0 | 1 |
| PF04699 | P16-Arc        | 0 | 0 | 1 |
| PF04716 | ETC_C1_NDUFA5  | 0 | 0 | 1 |
| PF04719 | TAFII28        | 0 | 0 | 1 |
| PF04729 | Anti-silence   | 0 | 0 | 1 |
| PF04739 | AMPKBI         | 0 | 0 | 1 |
| PF04751 | DUF615         | 0 | 0 | 1 |
| PF04757 | Pex2_Pex12     | 0 | 0 | 1 |
| PF04758 | Ribosomal_S30  | 0 | 1 | 0 |
| PF04777 | Evr1_Alr       | 0 | 1 | 1 |
| PF04791 | LMBR1          | 0 | 0 | 1 |
| PF04794 | YdjC           | 0 | 1 | 1 |
| PF04810 | zf-Sec23_Sec24 | 0 | 0 | 1 |
| PF04811 | Sec23_trunk    | 0 | 0 | 1 |
| PF04815 | Sec23_helical  | 0 | 1 | 1 |
| PF04857 | CAF1           | 0 | 1 | 1 |
| PF04874 | Mak16          | 0 | 1 | 1 |
| PF04893 | Yip1           | 0 | 0 | 1 |
| PF04900 | DUF652         | 0 | 1 | 1 |
| PF04926 | PAP_RNA-bind   | 0 | 0 | 1 |

|         |                 |   |   |   |
|---------|-----------------|---|---|---|
| PF04928 | PAP_central     | 0 | 0 | 1 |
| PF04932 | Wzy_C           | 1 | 1 | 1 |
| PF04939 | RRS1            | 0 | 0 | 1 |
| PF04950 | DUF663          | 0 | 0 | 1 |
| PF04954 | SIP             | 0 | 0 | 1 |
| PF04955 | HupE_UreJ       | 0 | 0 | 1 |
| PF04965 | GPW_gp25        | 0 | 0 | 1 |
| PF04973 | NMN_transporter | 0 | 0 | 1 |
| PF04977 | DivIC           | 0 | 1 | 0 |
| PF04984 | Phage_sheath_1  | 0 | 0 | 1 |
| PF04985 | Phage_tube      | 0 | 0 | 1 |
| PF04990 | RNA_pol_Rpb1_7  | 1 | 1 | 0 |
| PF04991 | LicD            | 0 | 0 | 1 |
| PF04992 | RNA_pol_Rpb1_6  | 1 | 1 | 0 |
| PF04999 | FtsL            | 0 | 0 | 1 |
| PF05001 | RNA_pol_Rpb1_R  | 1 | 1 | 1 |
| PF05002 | SGS             | 0 | 0 | 1 |
| PF05007 | Mannosyl_trans  | 0 | 0 | 1 |
| PF05008 | V-SNARE         | 0 | 0 | 1 |
| PF05013 | FGase           | 0 | 0 | 1 |
| PF05015 | Plasmid_killer  | 0 | 0 | 1 |
| PF05016 | Plasmid_stabil  | 1 | 0 | 0 |
| PF05025 | RbsD_FucU       | 0 | 1 | 1 |
| PF05036 | SPOR            | 0 | 1 | 1 |
| PF05047 | L51_S25_CI-B8   | 0 | 0 | 1 |
| PF05057 | DUF676          | 0 | 0 | 1 |
| PF05065 | Phage_capsid    | 0 | 0 | 1 |
| PF05067 | Mn_catalase     | 0 | 1 | 1 |
| PF05088 | Bac_GDH         | 0 | 0 | 1 |
| PF05093 | DUF689          | 0 | 0 | 1 |
| PF05107 | DUF694          | 0 | 1 | 1 |
| PF05114 | DUF692          | 0 | 0 | 1 |
| PF05115 | PetL            | 0 | 0 | 1 |
| PF05119 | Terminase_4     | 0 | 0 | 1 |
| PF05127 | DUF699          | 1 | 1 | 0 |
| PF05129 | DUF701          | 0 | 1 | 0 |
| PF05138 | PaaA_PaaC       | 0 | 0 | 1 |
| PF05145 | AmoA            | 0 | 0 | 1 |
| PF05148 | Methyltransf_8  | 0 | 1 | 1 |
| PF05158 | RNA_pol_Rpc34   | 0 | 0 | 1 |
| PF05180 | zf-DNL          | 0 | 0 | 1 |
| PF05182 | Fip1            | 0 | 0 | 1 |
| PF05186 | Dpy-30          | 0 | 0 | 1 |
| PF05194 | UreE_C          | 0 | 1 | 1 |
| PF05207 | zf-CSL          | 0 | 0 | 1 |
| PF05209 | MinC_N          | 0 | 0 | 1 |
| PF05227 | CHASE3          | 0 | 1 | 1 |
| PF05231 | MASE1           | 0 | 0 | 1 |
| PF05235 | CHAD            | 0 | 1 | 1 |
| PF05277 | DUF726          | 0 | 0 | 1 |
| PF05383 | La              | 0 | 1 | 1 |

|         |                 |   |   |   |
|---------|-----------------|---|---|---|
| PF05425 | CopD            | 0 | 0 | 1 |
| PF05448 | AXE1            | 0 | 1 | 1 |
| PF05491 | RuvB_C          | 1 | 1 | 1 |
| PF05496 | RuvB_N          | 1 | 1 | 1 |
| PF05525 | Branch_AA_trans | 0 | 1 | 0 |
| PF05534 | HicB            | 0 | 1 | 1 |
| PF05545 | FixQ            | 0 | 0 | 1 |
| PF05603 | DUF775          | 0 | 0 | 1 |
| PF05620 | DUF788          | 0 | 0 | 1 |
| PF05636 | DUF795          | 0 | 0 | 1 |
| PF05661 | DUF808          | 0 | 0 | 1 |
| PF05669 | SOH1            | 0 | 0 | 1 |
| PF05685 | DUF820          | 0 | 0 | 1 |
| PF05713 | MobC            | 0 | 0 | 1 |
| PF05739 | SNARE           | 1 | 1 | 1 |
| PF05773 | RWD             | 0 | 0 | 1 |
| PF05779 | DUF838          | 0 | 0 | 1 |
| PF05787 | DUF839          | 0 | 1 | 1 |
| PF05816 | TelA            | 0 | 0 | 1 |
| PF05853 | DUF849          | 0 | 1 | 1 |
| PF05866 | RusA            | 0 | 0 | 1 |
| PF05871 | DUF852          | 0 | 0 | 1 |
| PF05872 | DUF853          | 0 | 0 | 1 |
| PF05891 | DUF858          | 0 | 0 | 1 |
| PF05899 | Cupin_3         | 0 | 1 | 1 |
| PF05901 | Excalibur       | 0 | 0 | 1 |
| PF05903 | DUF862          | 0 | 0 | 1 |
| PF05907 | DUF866          | 0 | 0 | 1 |
| PF05909 | IWS1_C          | 0 | 0 | 1 |
| PF05916 | Sld5            | 0 | 0 | 1 |
| PF05954 | Phage_GPD       | 0 | 0 | 1 |
| PF05960 | DUF885          | 0 | 0 | 1 |
| PF05962 | DUF886          | 0 | 1 | 1 |
| PF05973 | Gp49            | 0 | 1 | 1 |
| PF05976 | DUF893          | 0 | 0 | 1 |
| PF05982 | DUF897          | 0 | 1 | 1 |
| PF05985 | EutC            | 0 | 0 | 1 |
| PF05997 | Nop52           | 0 | 0 | 1 |
| PF06017 | Myosin_tail_2   | 0 | 0 | 1 |
| PF06029 | AlkA_N          | 0 | 0 | 1 |
| PF06039 | Mqo             | 0 | 1 | 1 |
| PF06063 | DUF931          | 0 | 1 | 1 |
| PF06089 | Asparaginase_II | 0 | 0 | 1 |
| PF06093 | Spt4            | 0 | 0 | 1 |
| PF06149 | DUF969          | 0 | 1 | 1 |
| PF06165 | Glyco_transf_36 | 0 | 0 | 1 |
| PF06166 | DUF979          | 0 | 1 | 1 |
| PF06182 | DUF990          | 0 | 1 | 1 |
| PF06220 | zf-U1           | 0 | 0 | 1 |
| PF06224 | DUF1006         | 0 | 0 | 1 |
| PF06230 | DUF1009         | 0 | 0 | 1 |

|         |                 |   |   |   |
|---------|-----------------|---|---|---|
| PF06243 | PaaB            | 0 | 0 | 1 |
| PF06250 | DUF1016         | 0 | 0 | 1 |
| PF06289 | FlbD            | 0 | 0 | 1 |
| PF06339 | Ectoine_synth   | 0 | 0 | 1 |
| PF06354 | DUF1063         | 0 | 0 | 1 |
| PF06391 | MAT1            | 0 | 0 | 1 |
| PF06417 | DUF1077         | 0 | 0 | 1 |
| PF06423 | GWT1            | 0 | 0 | 1 |
| PF06445 | AraC_E_bind     | 1 | 0 | 0 |
| PF06580 | His_kinase      | 0 | 1 | 1 |
| PF06602 | Myotub-related  | 0 | 1 | 1 |
| PF06719 | AraC_N          | 0 | 0 | 1 |
| PF06725 | 3D              | 0 | 1 | 1 |
| PF06732 | Pescadillo_N    | 0 | 1 | 1 |
| PF06747 | CHCH            | 0 | 0 | 1 |
| PF06751 | EutB            | 0 | 0 | 1 |
| PF06769 | DUF1224         | 0 | 1 | 1 |
| PF06772 | LtrA            | 0 | 0 | 1 |
| PF06777 | DUF1227         | 0 | 0 | 1 |
| PF06807 | Clp1            | 0 | 0 | 1 |
| PF06821 | DUF1234         | 0 | 0 | 1 |
| PF06826 | Asp-Al_Ex       | 0 | 1 | 1 |
| PF06838 | Alum_res        | 0 | 0 | 1 |
| PF06843 | DUF1243         | 0 | 0 | 1 |
| PF06845 | IolB            | 0 | 0 | 1 |
| PF06883 | RNA_pol_Rpa2_4  | 0 | 0 | 1 |
| PF06923 | GutM            | 0 | 0 | 1 |
| PF06949 | DUF1292         | 0 | 0 | 1 |
| PF06953 | ArsD            | 0 | 0 | 1 |
| PF06971 | Put_DNA-bind_C  | 0 | 1 | 1 |
| PF06978 | POP1            | 0 | 0 | 1 |
| PF06993 | DUF1304         | 0 | 0 | 1 |
| PF07021 | MetW            | 0 | 0 | 1 |
| PF07043 | DUF1328         | 0 | 0 | 1 |
| PF07055 | scADH           | 0 | 0 | 1 |
| PF07065 | D123            | 0 | 0 | 1 |
| PF07075 | DUF1343         | 0 | 1 | 1 |
| PF07080 | DUF1348         | 0 | 0 | 1 |
| PF07099 | DUF1361         | 0 | 0 | 1 |
| PF07136 | DUF1385         | 0 | 0 | 1 |
| PF07155 | DUF1393         | 0 | 0 | 1 |
| PF07167 | PhaC_N          | 0 | 0 | 1 |
| PF07221 | GlcNAc_2-epim   | 0 | 1 | 1 |
| PF07228 | SpoIIE          | 1 | 1 | 1 |
| PF07275 | ArdA            | 0 | 0 | 1 |
| PF07311 | DUF1458         | 0 | 1 | 1 |
| PF07394 | DUF1501         | 0 | 0 | 1 |
| PF07396 | Porin_O_P       | 0 | 0 | 1 |
| PF07456 | Hpre_diP_synt_I | 0 | 0 | 1 |
| PF07499 | RuvA_C          | 0 | 1 | 1 |
| PF07500 | TFIIS_M         | 0 | 0 | 1 |

|         |                |   |   |   |
|---------|----------------|---|---|---|
| PF07504 | FTP            | 0 | 1 | 1 |
| PF07505 | Gp37_Gp68      | 0 | 0 | 1 |
| PF07508 | Recombinase    | 0 | 1 | 1 |
| PF07510 | DUF1524        | 0 | 1 | 1 |
| PF07534 | TLD            | 0 | 1 | 1 |
| PF07582 | AP_endonuc_2_N | 0 | 0 | 1 |
| PF07645 | EGF_CA         | 0 | 1 | 1 |
| PF07647 | SAM_2          | 0 | 1 | 1 |
| PF07660 | STN            | 0 | 1 | 1 |
| PF07663 | EIIBC-GUT_C    | 0 | 0 | 1 |
| PF07677 | A2M_recep      | 0 | 0 | 1 |
| PF07678 | A2M_comp       | 0 | 0 | 1 |
| PF07698 | 7TM-7TMR_HD    | 0 | 1 | 1 |
| PF07702 | UTRA           | 0 | 1 | 1 |
| PF07716 | bZIP_2         | 0 | 1 | 1 |
| PF07718 | DUF1606        | 0 | 1 | 0 |
| PF07727 | RVT_2          | 0 | 0 | 1 |
| PF07730 | HisKA_3        | 0 | 1 | 0 |
| PF07736 | CM_1           | 0 | 1 | 1 |
| PF07738 | Sad1_UNC       | 0 | 0 | 1 |
| PF07751 | Abi_2          | 0 | 0 | 1 |
| PF07766 | LETM1          | 0 | 0 | 1 |
| PF07770 | SFT2           | 0 | 0 | 1 |
| PF07780 | Spb1_C         | 0 | 0 | 1 |
| PF07848 | PaaX           | 0 | 0 | 1 |
| PF07879 | PHB_acc_N      | 0 | 0 | 1 |
| PF07907 | YibE_F         | 0 | 0 | 1 |
| PF07908 | D-aminoacyl_C  | 0 | 0 | 1 |
| PF07933 | DUF1681        | 0 | 0 | 1 |
| PF07940 | Hepar_II_III   | 0 | 0 | 1 |
| PF07943 | PBP5_C         | 0 | 0 | 1 |
| PF07944 | DUF1680        | 0 | 0 | 1 |

---
