# Supplementary material
Source: PubMed Central journal article supplement (PMC1838628)
Supplement: pnas_0611557104_3.pdf [file pnas_0611557104_3.pdf]

Table 2. List of taxonomic ranges (up to 4th level) listed in the Pfam database and their taxonomic rank.

| Number | Taxonomic range (upto 4th level)                              | Taxonomic rank                        |
|--------|---------------------------------------------------------------|---------------------------------------|
| 1      | Archaea; Crenarchaeota; Thermoprotei; Cenarchaeales           | superkingdom; phylum; class; order    |
| 2      | Archaea; Crenarchaeota; Thermoprotei; Desulfurococcales       | superkingdom; phylum; class; order    |
| 3      | Archaea; Crenarchaeota; Thermoprotei; Sulfolobales            | superkingdom; phylum; class; order    |
| 4      | Archaea; Crenarchaeota; Thermoprotei; Thermoproteales         | superkingdom; phylum; class; order    |
| 5      | Archaea; Euryarchaeota; Archaeoglobi; Archaeoglobales         | superkingdom; phylum; class; order    |
| 6      | Archaea; Euryarchaeota; Halobacteria; Halobacteriales         | superkingdom; phylum; class; order    |
| 7      | Archaea; Euryarchaeota; Methanobacteria; Methanobacteriales   | superkingdom; phylum; class; order    |
| 8      | Archaea; Euryarchaeota; Methanococci; Methanococcales         | superkingdom; phylum; class; order    |
| 9      | Archaea; Euryarchaeota; Methanomicrobia; Methanomicrobiales   | superkingdom; phylum; class; order    |
| 10     | Archaea; Euryarchaeota; Methanomicrobia; Methanosarcinales    | superkingdom; phylum; class; order    |
| 11     | Archaea; Euryarchaeota; Methanopyri; Methanopyrales           | superkingdom; phylum; class; order    |
| 12     | Archaea; Euryarchaeota; Thermococci; Thermococcales           | superkingdom; phylum; class; order    |
| 13     | Archaea; Euryarchaeota; Thermoplasmata; Thermoplasmatales     | superkingdom; phylum; class; order    |
| 14     | Bacteria; Acidobacteria; Acidobacteriales; Acidobacteriaceae  | superkingdom; phylum; order; family   |
| 15     | Bacteria; Actinobacteria; Acidimicrobiales; Acidimicrobiales  | superkingdom; phylum; subclass; order |
| 16     | Bacteria; Actinobacteria; Actinobacteridae; Actinomycetales   | superkingdom; phylum; subclass; order |
| 17     | Bacteria; Actinobacteria; Actinobacteridae; Bifidobacteriales | superkingdom; phylum; subclass; order |
| 18     | Bacteria; Actinobacteria; Rubrobacteridae; Rubrobacteriales   | superkingdom; phylum; subclass; order |
| 19     | Bacteria; Aquificae; Aquificales; Aquificaceae                | superkingdom; phylum; order; family   |
| 20     | Bacteria; Bacteroidetes; Flavobacteria; Flavobacteriales      | superkingdom; phylum; class; order    |
| 21     | Bacteria; Bacteroidetes; Sphingobacteria; Sphingobacteriales  | superkingdom; phylum; class; order    |
| 22     | Bacteria; Chlamydiae; Chlamydiales; Chlamydiaceae             | superkingdom; phylum; order; family   |
| 23     | Bacteria; Chlamydiae; Chlamydiales; Parachlamydiaceae         | superkingdom; phylum; order; family   |
| 24     | Bacteria; Chlamydiae; Chlamydiales; Simkaniaceae              | superkingdom; phylum; order; family   |
| 25     | Bacteria; Chlamydiae; Chlamydiales; Waddliaceae               | superkingdom; phylum; order; family   |
| 26     | Bacteria; Chlorobi; Chlorobia; Chlorobiales                   | superkingdom; phylum; class; order    |
| 27     | Bacteria; Chloroflexi; Chloroflexales; Chloroflexaceae        | superkingdom; phylum; order; family   |
| 28     | Bacteria; Chloroflexi; Herpetosiphonales; Herpetosiphonaceae  | superkingdom; phylum; order; family   |
| 29     | Bacteria; Cyanobacteria; Chroococcales; Aphanothece           | superkingdom; phylum; order; genus    |
| 30     | Bacteria; Cyanobacteria; Chroococcales; Chroococcus           | superkingdom; phylum; order; genus    |
| 31     | Bacteria; Cyanobacteria; Chroococcales; Crocosphaera          | superkingdom; phylum; order; genus    |
| 32     | Bacteria; Cyanobacteria; Chroococcales; Cyanobium             | superkingdom; phylum; order; genus    |
| 33     | Bacteria; Cyanobacteria; Chroococcales; Cyanothece            | superkingdom; phylum; order; genus    |
| 34     | Bacteria; Cyanobacteria; Chroococcales; Dactylococcopsis      | superkingdom; phylum; order; genus    |
| 35     | Bacteria; Cyanobacteria; Chroococcales; Gloeobacter           | superkingdom; phylum; order; genus    |
| 36     | Bacteria; Cyanobacteria; Chroococcales; Gloeocapsa            | superkingdom; phylum; order; genus    |
| 37     | Bacteria; Cyanobacteria; Chroococcales; Gloeotheca            | superkingdom; phylum; order; genus    |
| 38     | Bacteria; Cyanobacteria; Chroococcales; Microcystis           | superkingdom; phylum; order; genus    |
| 39     | Bacteria; Cyanobacteria; Chroococcales; Synechococcus         | superkingdom; phylum; order; genus    |
| 40     | Bacteria; Cyanobacteria; Chroococcales; Synechocystis         | superkingdom; phylum; order; genus    |
| 41     | Bacteria; Cyanobacteria; Chroococcales; Thermosynechococcus   | superkingdom; phylum; order; genus    |
| 42     | Bacteria; Cyanobacteria; Nostocales; Microchaetaceae          | superkingdom; phylum; order; family   |
| 43     | Bacteria; Cyanobacteria; Nostocales; Nostocaceae              | superkingdom; phylum; order; family   |
| 44     | Bacteria; Cyanobacteria; Nostocales; Rivulariaceae            | superkingdom; phylum; order; family   |
| 45     | Bacteria; Cyanobacteria; Nostocales; Scytonemataceae          | superkingdom; phylum; order; family   |
| 46     | Bacteria; Cyanobacteria; Oscillatoriales; Arthrospira         | superkingdom; phylum; order; genus    |
| 47     | Bacteria; Cyanobacteria; Oscillatoriales; Geitlerinema        | superkingdom; phylum; order; genus    |
| 48     | Bacteria; Cyanobacteria; Oscillatoriales; Katagnymene         | superkingdom; phylum; order; genus    |
| 49     | Bacteria; Cyanobacteria; Oscillatoriales; Leptolyngbya        | superkingdom; phylum; order; genus    |
| 50     | Bacteria; Cyanobacteria; Oscillatoriales; Lyngbya             | superkingdom; phylum; order; genus    |
| 51     | Bacteria; Cyanobacteria; Oscillatoriales; Microcoleus         | superkingdom; phylum; order; genus    |
| 52     | Bacteria; Cyanobacteria; Oscillatoriales; Oscillatoria        | superkingdom; phylum; order; genus    |
| 53     | Bacteria; Cyanobacteria; Oscillatoriales; Phormidium          | superkingdom; phylum; order; genus    |
| 54     | Bacteria; Cyanobacteria; Oscillatoriales; Planktothrix        | superkingdom; phylum; order; genus    |
| 55     | Bacteria; Cyanobacteria; Oscillatoriales; Plectonema          | superkingdom; phylum; order; genus    |
| 56     | Bacteria; Cyanobacteria; Oscillatoriales; Spirulina           | superkingdom; phylum; order; genus    |
| 57     | Bacteria; Cyanobacteria; Oscillatoriales; Symploca            | superkingdom; phylum; order; genus    |
| 58     | Bacteria; Cyanobacteria; Oscillatoriales; Trichodesmium       | superkingdom; phylum; order; genus    |
| 59     | Bacteria; Cyanobacteria; Oscillatoriales; Tychonema           | superkingdom; phylum; order; genus    |
| 60     | Bacteria; Cyanobacteria; Pleurocapsales; Crococcidiopsis      | superkingdom; phylum; order; genus    |
| 61     | Bacteria; Cyanobacteria; Pleurocapsales; Dermocarpa           | superkingdom; phylum; order; genus    |
| 62     | Bacteria; Cyanobacteria; Pleurocapsales; Myxosarcina          | superkingdom; phylum; order; genus    |
| 63     | Bacteria; Cyanobacteria; Pleurocapsales; Pleurocapsa          | superkingdom; phylum; order; genus    |
| 64     | Bacteria; Cyanobacteria; Pleurocapsales; Stanieria            | superkingdom; phylum; order; genus    |
| 65     | Bacteria; Cyanobacteria; Pleurocapsales; Xenococcus           | superkingdom; phylum; order; genus    |
| 66     | Bacteria; Cyanobacteria; Prochlorophytes; Prochloraceae       | superkingdom; phylum; no rank; family |
| 67     | Bacteria; Cyanobacteria; Prochlorophytes; Prochlorococaceae   | superkingdom; phylum; no rank; family |
| 68     | Bacteria; Cyanobacteria; Prochlorophytes; Prochlorothricaceae | superkingdom; phylum; no rank; family |
| 69     | Bacteria; Cyanobacteria; Stigonematales; Chlorogloeopsis      | superkingdom; phylum; order; genus    |

|     |                                                                      |                                      |
|-----|----------------------------------------------------------------------|--------------------------------------|
| 70  | Bacteria; Cyanobacteria; Stigonematales; Fischerella                 | superkingdom; phylum; order; genus   |
| 71  | Bacteria; Cyanobacteria; Stigonematales; Hapalosiphon                | superkingdom; phylum; order; genus   |
| 72  | Bacteria; Cyanobacteria; Stigonematales; Mastigocladus               | superkingdom; phylum; order; genus   |
| 73  | Bacteria; Deferribacteres; Deferribacterales; Deferribacteraceae     | superkingdom; phylum; order; family  |
| 74  | Bacteria; Deinococcus-Thermus; Deinococci; Deinococcales             | superkingdom; phylum; class; order   |
| 75  | Bacteria; Deinococcus-Thermus; Deinococci; Thermales                 | superkingdom; phylum; class; order   |
| 76  | Bacteria; Dictyoglomi; Dictyoglomales; Dictyoglomaceae               | superkingdom; phylum; order; family  |
| 77  | Bacteria; Fibrobacteres; Fibrobacterales; Fibrobacteraceae           | superkingdom; phylum; order; family  |
| 78  | Bacteria; Firmicutes; Bacillales; Alicyclobacillaceae                | superkingdom; phylum; order; family  |
| 79  | Bacteria; Firmicutes; Bacillales; Bacillaceae                        | superkingdom; phylum; order; family  |
| 80  | Bacteria; Firmicutes; Bacillales; Gemella                            | superkingdom; phylum; order; genus   |
| 81  | Bacteria; Firmicutes; Bacillales; Listeriaceae                       | superkingdom; phylum; order; family  |
| 82  | Bacteria; Firmicutes; Bacillales; Macrococci                         | superkingdom; phylum; order; genus   |
| 83  | Bacteria; Firmicutes; Bacillales; Paenibacillaceae                   | superkingdom; phylum; order; family  |
| 84  | Bacteria; Firmicutes; Bacillales; Planococcaceae                     | superkingdom; phylum; order; family  |
| 85  | Bacteria; Firmicutes; Bacillales; Sporolactobacillaceae              | superkingdom; phylum; order; family  |
| 86  | Bacteria; Firmicutes; Bacillales; Staphylococcus                     | superkingdom; phylum; order; genus   |
| 87  | Bacteria; Firmicutes; Bacillales; Thermoactinomycetaceae             | superkingdom; phylum; order; family  |
| 88  | Bacteria; Firmicutes; Clostridia; Clostridiales                      | superkingdom; phylum; class; order   |
| 89  | Bacteria; Firmicutes; Clostridia; Halanaerobiales                    | superkingdom; phylum; class; order   |
| 90  | Bacteria; Firmicutes; Clostridia; Thermoanaerobacteriales            | superkingdom; phylum; class; order   |
| 91  | Bacteria; Firmicutes; Lactobacillales; Aerococcaceae                 | superkingdom; phylum; order; family  |
| 92  | Bacteria; Firmicutes; Lactobacillales; Carnobacteriaceae             | superkingdom; phylum; order; family  |
| 93  | Bacteria; Firmicutes; Lactobacillales; Enterococcaceae               | superkingdom; phylum; order; family  |
| 94  | Bacteria; Firmicutes; Lactobacillales; Lactobacillaceae              | superkingdom; phylum; order; family  |
| 95  | Bacteria; Firmicutes; Lactobacillales; Leuconostoc                   | superkingdom; phylum; order; genus   |
| 96  | Bacteria; Firmicutes; Lactobacillales; Oenococcus                    | superkingdom; phylum; order; genus   |
| 97  | Bacteria; Firmicutes; Lactobacillales; Streptococcaceae              | superkingdom; phylum; order; family  |
| 98  | Bacteria; Firmicutes; Lactobacillales; Weissella                     | superkingdom; phylum; order; genus   |
| 99  | Bacteria; Firmicutes; Mollicutes; Acholeplasmatales                  | superkingdom; phylum; class; order   |
| 100 | Bacteria; Firmicutes; Mollicutes; Anaeroplasmatales                  | superkingdom; phylum; class; order   |
| 101 | Bacteria; Firmicutes; Mollicutes; Entomoplasmatales                  | superkingdom; phylum; class; order   |
| 102 | Bacteria; Firmicutes; Mollicutes; Mycoplasmataceae                   | superkingdom; phylum; class; family  |
| 103 | Bacteria; Fusobacteria; Fusobacteriales; Fusobacteriaceae            | superkingdom; phylum; order; family  |
| 104 | Bacteria; Nitrospirae; Nitrospirales; Nitrospiraceae                 | superkingdom; phylum; order; family  |
| 105 | Bacteria; Planctomycetes; Planctomycetacia; Planctomycetales         | superkingdom; phylum; class; order   |
| 106 | Bacteria; Proteobacteria; Alphaproteobacteria; Caulobacterales       | superkingdom; phylum; class; order   |
| 107 | Bacteria; Proteobacteria; Alphaproteobacteria; Rhizobiales           | superkingdom; phylum; class; order   |
| 108 | Bacteria; Proteobacteria; Alphaproteobacteria; Rhodobacterales       | superkingdom; phylum; class; order   |
| 109 | Bacteria; Proteobacteria; Alphaproteobacteria; Rhodospirillales      | superkingdom; phylum; class; order   |
| 110 | Bacteria; Proteobacteria; Alphaproteobacteria; Rickettsiales         | superkingdom; phylum; class; order   |
| 111 | Bacteria; Proteobacteria; Alphaproteobacteria; Sphingomonadales      | superkingdom; phylum; class; order   |
| 112 | Bacteria; Proteobacteria; Betaproteobacteria; Burkholderiales        | superkingdom; phylum; class; order   |
| 113 | Bacteria; Proteobacteria; Betaproteobacteria; Candidatus Tremblaya   | superkingdom; phylum; class; genus   |
| 114 | Bacteria; Proteobacteria; Betaproteobacteria; Hydrogenophilales      | superkingdom; phylum; class; order   |
| 115 | Bacteria; Proteobacteria; Betaproteobacteria; Kinetoplastibacterium  | superkingdom; phylum; class; genus   |
| 116 | Bacteria; Proteobacteria; Betaproteobacteria; Methylophilales        | superkingdom; phylum; class; order   |
| 117 | Bacteria; Proteobacteria; Betaproteobacteria; Neisseriales           | superkingdom; phylum; class; order   |
| 118 | Bacteria; Proteobacteria; Betaproteobacteria; Nitrosomonadales       | superkingdom; phylum; class; order   |
| 119 | Bacteria; Proteobacteria; Betaproteobacteria; Rhodocyclales          | superkingdom; phylum; class; order   |
| 120 | Bacteria; Proteobacteria; Deltaproteobacteria; Bdellovibrionales     | superkingdom; phylum; class; order   |
| 121 | Bacteria; Proteobacteria; Deltaproteobacteria; Desulfatibacillum     | superkingdom; phylum; class; genus   |
| 122 | Bacteria; Proteobacteria; Deltaproteobacteria; Desulfobacteriales    | superkingdom; phylum; class; order   |
| 123 | Bacteria; Proteobacteria; Deltaproteobacteria; Desulfovibrionales    | superkingdom; phylum; class; order   |
| 124 | Bacteria; Proteobacteria; Deltaproteobacteria; Desulfuromonadales    | superkingdom; phylum; class; order   |
| 125 | Bacteria; Proteobacteria; Deltaproteobacteria; Myxococcales          | superkingdom; phylum; class; order   |
| 126 | Bacteria; Proteobacteria; Deltaproteobacteria; Syntrophobacteriales  | superkingdom; phylum; class; order   |
| 127 | Bacteria; Proteobacteria; Epsilonproteobacteria; Campylobacteriales  | superkingdom; phylum; class; order   |
| 128 | Bacteria; Proteobacteria; Gammaproteobacteria; Acidithiobacillales   | superkingdom; phylum; class; order   |
| 129 | Bacteria; Proteobacteria; Gammaproteobacteria; Aeromonadales         | superkingdom; phylum; class; order   |
| 130 | Bacteria; Proteobacteria; Gammaproteobacteria; Alteromonadales       | superkingdom; phylum; class; order   |
| 131 | Bacteria; Proteobacteria; Gammaproteobacteria; Baumannia             | superkingdom; phylum; class; no rank |
| 132 | Bacteria; Proteobacteria; Gammaproteobacteria; Candidatus Carsonella | superkingdom; phylum; class; genus   |
| 133 | Bacteria; Proteobacteria; Gammaproteobacteria; Cardiobacteriales     | superkingdom; phylum; class; order   |
| 134 | Bacteria; Proteobacteria; Gammaproteobacteria; Chromatiales          | superkingdom; phylum; class; order   |
| 135 | Bacteria; Proteobacteria; Gammaproteobacteria; Enterobacteriales     | superkingdom; phylum; class; order   |
| 136 | Bacteria; Proteobacteria; Gammaproteobacteria; Legionellales         | superkingdom; phylum; class; order   |
| 137 | Bacteria; Proteobacteria; Gammaproteobacteria; Methylococcales       | superkingdom; phylum; class; order   |
| 138 | Bacteria; Proteobacteria; Gammaproteobacteria; Methylohalobium       | superkingdom; phylum; class; genus   |
| 139 | Bacteria; Proteobacteria; Gammaproteobacteria; Oceanospirillales     | superkingdom; phylum; class; order   |
| 140 | Bacteria; Proteobacteria; Gammaproteobacteria; Pasteurellales        | superkingdom; phylum; class; order   |
| 141 | Bacteria; Proteobacteria; Gammaproteobacteria; Pseudomonadales       | superkingdom; phylum; class; order   |
| 142 | Bacteria; Proteobacteria; Gammaproteobacteria; Thiotrichales         | superkingdom; phylum; class; order   |

|     |                                                                                      |                                          |
|-----|--------------------------------------------------------------------------------------|------------------------------------------|
| 143 | Bacteria; Proteobacteria; Gammaproteobacteria; Vibrionales                           | superkingdom; phylum; class; order       |
| 144 | Bacteria; Proteobacteria; Gammaproteobacteria; Xanthomonadales                       | superkingdom; phylum; class; order       |
| 145 | Bacteria; Spirochaetes; Spirochaetales; Brachyspiraceae                              | superkingdom; phylum; order; family      |
| 146 | Bacteria; Spirochaetes; Spirochaetales; Leptospiraceae                               | superkingdom; phylum; order; family      |
| 147 | Bacteria; Spirochaetes; Spirochaetales; Spirochaetaceae                              | superkingdom; phylum; order; family      |
| 148 | Bacteria; Thermodesulfobacteria; Thermodesulfobacteriales; Thermodesulfobacteriaceae | superkingdom; phylum; order; family      |
| 149 | Bacteria; Thermomicrobia; Thermomicrobiales; Thermomicrobiaceae                      | superkingdom; phylum; order; family      |
| 150 | Bacteria; Thermotogae; Thermotogales; Thermotogaceae                                 | superkingdom; phylum; order; family      |
| 151 | Bacteria; Verrucomicrobia; Verrucomicrobiae; Verrucomicrobiales                      | superkingdom; phylum; class; order       |
| 152 | Eukaryota; Alveolata; Apicomplexa; Coccidia                                          | superkingdom; no rank; phylum; class     |
| 153 | Eukaryota; Alveolata; Apicomplexa; Gregarina                                         | superkingdom; no rank; phylum; class     |
| 154 | Eukaryota; Alveolata; Apicomplexa; Haemosporida                                      | superkingdom; no rank; phylum; order     |
| 155 | Eukaryota; Alveolata; Apicomplexa; Piroplasmida                                      | superkingdom; no rank; phylum; no rank   |
| 156 | Eukaryota; Alveolata; Ciliophora; Colpodea                                           | superkingdom; no rank; no rank; class    |
| 157 | Eukaryota; Alveolata; Ciliophora; Heterotrichea                                      | superkingdom; no rank; no rank; class    |
| 158 | Eukaryota; Alveolata; Ciliophora; Karyorelictea                                      | superkingdom; no rank; no rank; class    |
| 159 | Eukaryota; Alveolata; Ciliophora; Litostomatea                                       | superkingdom; no rank; no rank; class    |
| 160 | Eukaryota; Alveolata; Ciliophora; Nassophorea                                        | superkingdom; no rank; no rank; class    |
| 161 | Eukaryota; Alveolata; Ciliophora; Oligohymenophorea                                  | superkingdom; no rank; no rank; class    |
| 162 | Eukaryota; Alveolata; Ciliophora; Phyllopharyngea                                    | superkingdom; no rank; no rank; class    |
| 163 | Eukaryota; Alveolata; Ciliophora; Spirotrichea                                       | superkingdom; no rank; no rank; class    |
| 164 | Eukaryota; Alveolata; Dinophyceae; Dinophysidae                                      | superkingdom; no rank; class; family     |
| 165 | Eukaryota; Alveolata; Dinophyceae; Gonyaulacales                                     | superkingdom; no rank; class; order      |
| 166 | Eukaryota; Alveolata; Dinophyceae; Gymnodiniales                                     | superkingdom; no rank; class; order      |
| 167 | Eukaryota; Alveolata; Dinophyceae; Oxyrrhinaeae                                      | superkingdom; no rank; class; family     |
| 168 | Eukaryota; Alveolata; Dinophyceae; Peridinales                                       | superkingdom; no rank; class; order      |
| 169 | Eukaryota; Alveolata; Dinophyceae; Procentrales                                      | superkingdom; no rank; class; order      |
| 170 | Eukaryota; Alveolata; Dinophyceae; Pyrocystales                                      | superkingdom; no rank; class; order      |
| 171 | Eukaryota; Alveolata; Dinophyceae; Suessiales                                        | superkingdom; no rank; class; order      |
| 172 | Eukaryota; Alveolata; Dinophyceae; Thoracosphaerales                                 | superkingdom; no rank; class; order      |
| 173 | Eukaryota; Alveolata; Perkinsea; Perkinsida                                          | superkingdom; no rank; no rank; order    |
| 174 | Eukaryota; Centroheliozoa; Acanthocystidae; Pterocystis                              | superkingdom; no rank; family; genus     |
| 175 | Eukaryota; Centroheliozoa; Heterophryida; Chlamyaster                                | superkingdom; no rank; family; genus     |
| 176 | Eukaryota; Centroheliozoa; Raphidophryidae; Raphidophrys                             | superkingdom; no rank; family; genus     |
| 177 | Eukaryota; Cercozoa; Cercomonadida; Cercomonadidae                                   | superkingdom; no rank; order; family     |
| 178 | Eukaryota; Cercozoa; Chlorarachniophyceae; Bigelowiella                              | superkingdom; no rank; no rank; genus    |
| 179 | Eukaryota; Cercozoa; Chlorarachniophyceae; Chlorarachnion                            | superkingdom; no rank; no rank; genus    |
| 180 | Eukaryota; Cercozoa; Chlorarachniophyceae; Gymnochlora                               | superkingdom; no rank; no rank; genus    |
| 181 | Eukaryota; Cercozoa; Chlorarachniophyceae; Lotharella                                | superkingdom; no rank; no rank; genus    |
| 182 | Eukaryota; Cercozoa; Desmothoracida; Clathrulindae                                   | superkingdom; no rank; no rank; family   |
| 183 | Eukaryota; Cercozoa; Euglyphida; Euglyphidae                                         | superkingdom; no rank; order; family     |
| 184 | Eukaryota; Cercozoa; Gromiidae; Gromia                                               | superkingdom; no rank; family; genus     |
| 185 | Eukaryota; Cercozoa; Thaumatomonadida; Thaumatomastigidae                            | superkingdom; no rank; order; family     |
| 186 | Eukaryota; Choanoflagellida; Codonosigidae; Monosiga                                 | superkingdom; order; family; genus       |
| 187 | Eukaryota; Choanoflagellida; Codonosigidae; Proterospongia                           | superkingdom; order; family; genus       |
| 188 | Eukaryota; Cryptophyta; Cryptomonadaceae; Chromonas                                  | superkingdom; class; family; genus       |
| 189 | Eukaryota; Cryptophyta; Cryptomonadaceae; Cryptomonas                                | superkingdom; class; family; genus       |
| 190 | Eukaryota; Cryptophyta; Cryptomonadaceae; Guillardia                                 | superkingdom; class; family; genus       |
| 191 | Eukaryota; Cryptophyta; Cryptomonadaceae; Hanusia                                    | superkingdom; class; family; genus       |
| 192 | Eukaryota; Cryptophyta; Cryptomonadaceae; Pyrenomonas                                | superkingdom; class; family; genus       |
| 193 | Eukaryota; Cryptophyta; Cryptomonadaceae; Rhodomonas                                 | superkingdom; class; family; genus       |
| 194 | Eukaryota; Cryptophyta; Cryptomonadaceae; Storeatula                                 | superkingdom; class; family; genus       |
| 195 | Eukaryota; Cryptophyta; Goniomonadaceae; Goniomonas                                  | superkingdom; class; family; genus       |
| 196 | Eukaryota; Diplomonadida; Hexamitidae; Giardia                                       | superkingdom; no rank; family; subfamily |
| 197 | Eukaryota; Diplomonadida; Hexamitidae; Hexamitinae                                   | superkingdom; no rank; family; subfamily |
| 198 | Eukaryota; Euglenozoa; Diplonemida; Diplonema                                        | superkingdom; no rank; order; genus      |
| 199 | Eukaryota; Euglenozoa; Diplonemida; Rhynchopus                                       | superkingdom; no rank; order; genus      |
| 200 | Eukaryota; Euglenozoa; Euglenida; Cryptoglena                                        | superkingdom; no rank; phylum; genus     |
| 201 | Eukaryota; Euglenozoa; Euglenida; Euglenales                                         | superkingdom; no rank; phylum; order     |
| 202 | Eukaryota; Euglenozoa; Euglenida; Eutreptiales                                       | superkingdom; no rank; phylum; order     |
| 203 | Eukaryota; Euglenozoa; Euglenida; Heteronematales                                    | superkingdom; no rank; phylum; order     |
| 204 | Eukaryota; Euglenozoa; Euglenida; Rhabdomonadales                                    | superkingdom; no rank; phylum; order     |
| 205 | Eukaryota; Euglenozoa; Kinetoplastida; Bodonidae                                     | superkingdom; no rank; order; family     |
| 206 | Eukaryota; Euglenozoa; Kinetoplastida; Trypanosomatidae                              | superkingdom; no rank; order; family     |
| 207 | Eukaryota; Fungi; Ascomycota; Ascomycota incertae sedis                              | superkingdom; kingdom; phylum; no rank   |
| 208 | Eukaryota; Fungi; Ascomycota; Neolactales                                            | superkingdom; kingdom; phylum; order     |
| 209 | Eukaryota; Fungi; Ascomycota; Pezizomycotina                                         | superkingdom; kingdom; phylum; subphylum |
| 210 | Eukaryota; Fungi; Ascomycota; Pneumocystidomycetes                                   | superkingdom; kingdom; phylum; class     |
| 211 | Eukaryota; Fungi; Ascomycota; Saccharomycotina                                       | superkingdom; kingdom; phylum; subphylum |
| 212 | Eukaryota; Fungi; Ascomycota; Schizosaccharomycetes                                  | superkingdom; kingdom; phylum; class     |
| 213 | Eukaryota; Fungi; Ascomycota; Taphrinomycetes                                        | superkingdom; kingdom; phylum; class     |
| 214 | Eukaryota; Fungi; Ascomycota; mitosporic Ascomycota                                  | superkingdom; kingdom; phylum; no rank   |
| 215 | Eukaryota; Fungi; Basidiomycota; Hymenomycetes                                       | superkingdom; kingdom; phylum; no rank   |

|     |                                                                    |                                           |
|-----|--------------------------------------------------------------------|-------------------------------------------|
| 216 | Eukaryota; Fungi; Basidiomycota; Jaculispora                       | superkingdom; kingdom; phylum; genus      |
| 217 | Eukaryota; Fungi; Basidiomycota; Macrophomina                      | superkingdom; kingdom; phylum; genus      |
| 218 | Eukaryota; Fungi; Basidiomycota; Urediniomycetes                   | superkingdom; kingdom; phylum; class      |
| 219 | Eukaryota; Fungi; Basidiomycota; Ustilaginomycetes                 | superkingdom; kingdom; phylum; class      |
| 220 | Eukaryota; Fungi; Chytridiomycota; Blastocladales                  | superkingdom; kingdom; phylum; order      |
| 221 | Eukaryota; Fungi; Chytridiomycota; Chytridiales                    | superkingdom; kingdom; phylum; order      |
| 222 | Eukaryota; Fungi; Chytridiomycota; Monoblepharidales               | superkingdom; kingdom; phylum; order      |
| 223 | Eukaryota; Fungi; Chytridiomycota; Neocallimastixales              | superkingdom; kingdom; phylum; order      |
| 224 | Eukaryota; Fungi; Chytridiomycota; Spizellomycetales               | superkingdom; kingdom; phylum; order      |
| 225 | Eukaryota; Fungi; Fungi incertae sedis; 'Arthromyces'              | superkingdom; kingdom; no rank; no rank   |
| 226 | Eukaryota; Fungi; Fungi incertae sedis; Hyaloraphidium             | superkingdom; kingdom; no rank; genus     |
| 227 | Eukaryota; Fungi; Glomeromycota; Glomeromycetes                    | superkingdom; kingdom; phylum; class      |
| 228 | Eukaryota; Fungi; Microsporidia; Antonospora                       | superkingdom; kingdom; phylum; genus      |
| 229 | Eukaryota; Fungi; Microsporidia; Burenellidae                      | superkingdom; kingdom; phylum; family     |
| 230 | Eukaryota; Fungi; Microsporidia; Endoreticulata                    | superkingdom; kingdom; phylum; genus      |
| 231 | Eukaryota; Fungi; Microsporidia; Glugeidae                         | superkingdom; kingdom; phylum; family     |
| 232 | Eukaryota; Fungi; Microsporidia; Nosematidae                       | superkingdom; kingdom; phylum; family     |
| 233 | Eukaryota; Fungi; Microsporidia; Pleistophoridae                   | superkingdom; kingdom; phylum; family     |
| 234 | Eukaryota; Fungi; Microsporidia; Spragueidae                       | superkingdom; kingdom; phylum; family     |
| 235 | Eukaryota; Fungi; Microsporidia; Unikaryonidae                     | superkingdom; kingdom; phylum; family     |
| 236 | Eukaryota; Fungi; Zygomycota; Trichomycetes                        | superkingdom; kingdom; phylum; class      |
| 237 | Eukaryota; Fungi; Zygomycota; Zygomycetes                          | superkingdom; kingdom; phylum; class      |
| 238 | Eukaryota; Glaucocystophyceae; Cyanophoraceae; Cyanophora          | superkingdom; class; family; genus        |
| 239 | Eukaryota; Glaucocystophyceae; Gloeochaetales; Glaucosphaeraeaceae | superkingdom; class; order; family        |
| 240 | Eukaryota; Granuloreticulosea; Athalamea; Reticulomyxidae          | superkingdom; class; no rank; family      |
| 241 | Eukaryota; Granuloreticulosea; Foraminifera; Allogromida           | superkingdom; class; order; no rank       |
| 242 | Eukaryota; Granuloreticulosea; Foraminifera; Miliolina             | superkingdom; class; order; suborder      |
| 243 | Eukaryota; Granuloreticulosea; Foraminifera; Rotaliina             | superkingdom; class; order; suborder      |
| 244 | Eukaryota; Granuloreticulosea; Foraminifera; Textulariida          | superkingdom; class; order; no rank       |
| 245 | Eukaryota; Haptophyceae; Coccosphaerales; Calyptosphaeraeaceae     | superkingdom; no rank; order; family      |
| 246 | Eukaryota; Haptophyceae; Coccosphaerales; Coccolithus              | superkingdom; no rank; order; genus       |
| 247 | Eukaryota; Haptophyceae; Coccosphaerales; Helicosphaera            | superkingdom; no rank; order; genus       |
| 248 | Eukaryota; Haptophyceae; Coccosphaerales; Umbilicosphaera          | superkingdom; no rank; order; genus       |
| 249 | Eukaryota; Haptophyceae; Isochrysidales; Cricosphaera              | superkingdom; no rank; order; genus       |
| 250 | Eukaryota; Haptophyceae; Isochrysidales; Emiliana                  | superkingdom; no rank; order; genus       |
| 251 | Eukaryota; Haptophyceae; Isochrysidales; Imantonia                 | superkingdom; no rank; order; genus       |
| 252 | Eukaryota; Haptophyceae; Isochrysidales; Isochrysis                | superkingdom; no rank; order; genus       |
| 253 | Eukaryota; Haptophyceae; Isochrysidales; Ochrosphaera              | superkingdom; no rank; order; genus       |
| 254 | Eukaryota; Haptophyceae; Isochrysidales; Pseudoisochrysis          | superkingdom; no rank; order; genus       |
| 255 | Eukaryota; Haptophyceae; Pavloales; Diacronema                     | superkingdom; no rank; order; genus       |
| 256 | Eukaryota; Haptophyceae; Pavloales; Exanthemachrysis               | superkingdom; no rank; order; genus       |
| 257 | Eukaryota; Haptophyceae; Pavloales; Pavlova                        | superkingdom; no rank; order; genus       |
| 258 | Eukaryota; Haptophyceae; Prymnesiales; Chrysochromulina            | superkingdom; no rank; order; genus       |
| 259 | Eukaryota; Haptophyceae; Prymnesiales; Phaeocystis                 | superkingdom; no rank; order; genus       |
| 260 | Eukaryota; Haptophyceae; Prymnesiales; Platychrysis                | superkingdom; no rank; order; genus       |
| 261 | Eukaryota; Haptophyceae; Prymnesiales; Prymnesium                  | superkingdom; no rank; order; genus       |
| 262 | Eukaryota; Heterolobosea; Acrasida; Acrasis                        | superkingdom; class; order; genus         |
| 263 | Eukaryota; Heterolobosea; Schizopyrenida; Vahlkampfiidae           | superkingdom; class; order; family        |
| 264 | Eukaryota; Ichthyosporea; Ichthyophonida; Amoebidiaceae            | superkingdom; class; order; family        |
| 265 | Eukaryota; Ichthyosporea; Ichthyophonida; Ichthyophonus            | superkingdom; class; order; family        |
| 266 | Eukaryota; Lobosea; Euamoebida; Amoebidae                          | superkingdom; class; order; family        |
| 267 | Eukaryota; Lobosea; Euamoebida; Hartmannellidae                    | superkingdom; class; order; family        |
| 268 | Eukaryota; Lobosea; Euamoebida; Paramoebidae                       | superkingdom; class; order; family        |
| 269 | Eukaryota; Lobosea; Euamoebida; Thecamoebidae                      | superkingdom; class; order; family        |
| 270 | Eukaryota; Lobosea; Euamoebida; Vannellidae                        | superkingdom; class; order; family        |
| 271 | Eukaryota; Metazoa; Acanthocephala; Archiacanthocephala            | superkingdom; kingdom; phylum; class      |
| 272 | Eukaryota; Metazoa; Acanthocephala; Palaeacanthocephala            | superkingdom; kingdom; phylum; class      |
| 273 | Eukaryota; Metazoa; Annelida; Clitellata                           | superkingdom; kingdom; phylum; no rank    |
| 274 | Eukaryota; Metazoa; Annelida; Parascarpia                          | superkingdom; kingdom; phylum; genus      |
| 275 | Eukaryota; Metazoa; Annelida; Polychaeta                           | superkingdom; kingdom; phylum; class      |
| 276 | Eukaryota; Metazoa; Arthropoda; Chelicerata                        | superkingdom; kingdom; phylum; subphylum  |
| 277 | Eukaryota; Metazoa; Arthropoda; Crustacea                          | superkingdom; kingdom; phylum; subphylum  |
| 278 | Eukaryota; Metazoa; Arthropoda; Hexapoda                           | superkingdom; kingdom; phylum; superclass |
| 279 | Eukaryota; Metazoa; Arthropoda; Myriapoda                          | superkingdom; kingdom; phylum; subphylum  |
| 280 | Eukaryota; Metazoa; Bilateria incertae sedis; Gnathostomulida      | superkingdom; kingdom; no rank; phylum    |
| 281 | Eukaryota; Metazoa; Brachiopoda; Craniiformea                      | superkingdom; kingdom; phylum; subphylum  |
| 282 | Eukaryota; Metazoa; Brachiopoda; Linguliformea                     | superkingdom; kingdom; phylum; subphylum  |
| 283 | Eukaryota; Metazoa; Brachiopoda; Phoroniformea                     | superkingdom; kingdom; phylum; subphylum  |
| 284 | Eukaryota; Metazoa; Brachiopoda; Rhynchonelliformea                | superkingdom; kingdom; phylum; subphylum  |
| 285 | Eukaryota; Metazoa; Bryozoa; Gymnolaemata                          | superkingdom; kingdom; phylum; class      |
| 286 | Eukaryota; Metazoa; Bryozoa; Phylactolaemata                       | superkingdom; kingdom; phylum; class      |
| 287 | Eukaryota; Metazoa; Chaetognatha; Aphragmophora                    | superkingdom; kingdom; phylum; order      |
| 288 | Eukaryota; Metazoa; Chaetognatha; Phragmophora                     | superkingdom; kingdom; phylum; order      |

|     |                                                                |                                            |
|-----|----------------------------------------------------------------|--------------------------------------------|
| 289 | Eukaryota; Metazoa; Chordata; Cephalochordata                  | superkingdom; kingdom; phylum; subphylum   |
| 290 | Eukaryota; Metazoa; Chordata; Craniata                         | superkingdom; kingdom; phylum; subphylum   |
| 291 | Eukaryota; Metazoa; Chordata; Urochordata                      | superkingdom; kingdom; phylum; subphylum   |
| 292 | Eukaryota; Metazoa; Cnidaria; Anthozoa                         | superkingdom; kingdom; phylum; class       |
| 293 | Eukaryota; Metazoa; Cnidaria; Cubozoa                          | superkingdom; kingdom; phylum; class       |
| 294 | Eukaryota; Metazoa; Cnidaria; Hydrozoa                         | superkingdom; kingdom; phylum; class       |
| 295 | Eukaryota; Metazoa; Cnidaria; Scyphozoa                        | superkingdom; kingdom; phylum; class       |
| 296 | Eukaryota; Metazoa; Ctenophora; Cyclocoela                     | superkingdom; kingdom; phylum; no rank     |
| 297 | Eukaryota; Metazoa; Ctenophora; Typhlocoela                    | superkingdom; kingdom; phylum; no rank     |
| 298 | Eukaryota; Metazoa; Cycliophora; Symbion                       | superkingdom; kingdom; phylum; genus       |
| 299 | Eukaryota; Metazoa; Echinodermata; Eleutherozoa                | superkingdom; kingdom; phylum; no rank     |
| 300 | Eukaryota; Metazoa; Echinodermata; Pelmatozoa                  | superkingdom; kingdom; phylum; no rank     |
| 301 | Eukaryota; Metazoa; Echiura; Echiuroinea                       | superkingdom; kingdom; phylum; order       |
| 302 | Eukaryota; Metazoa; Echiura; Xenopneusta                       | superkingdom; kingdom; phylum; order       |
| 303 | Eukaryota; Metazoa; Entoprocta; Loxosomatidae                  | superkingdom; kingdom; phylum; family      |
| 304 | Eukaryota; Metazoa; Gastrotricha; Chaetodontida                | superkingdom; kingdom; phylum; order       |
| 305 | Eukaryota; Metazoa; Hemichordata; Enteropneusta                | superkingdom; kingdom; phylum; class       |
| 306 | Eukaryota; Metazoa; Mesozoa; Rhombozoa                         | superkingdom; kingdom; superphylum; phylum |
| 307 | Eukaryota; Metazoa; Micrognathozoa; Limnognathia               | superkingdom; kingdom; class; genus        |
| 308 | Eukaryota; Metazoa; Mollusca; Aplacophora                      | superkingdom; kingdom; phylum; class       |
| 309 | Eukaryota; Metazoa; Mollusca; Bivalvia                         | superkingdom; kingdom; phylum; class       |
| 310 | Eukaryota; Metazoa; Mollusca; Cephalopoda                      | superkingdom; kingdom; phylum; class       |
| 311 | Eukaryota; Metazoa; Mollusca; Gastropoda                       | superkingdom; kingdom; phylum; class       |
| 312 | Eukaryota; Metazoa; Mollusca; Polyplacophora                   | superkingdom; kingdom; phylum; class       |
| 313 | Eukaryota; Metazoa; Mollusca; Scaphopoda                       | superkingdom; kingdom; phylum; class       |
| 314 | Eukaryota; Metazoa; Myxozoa; Myxosporia                        | superkingdom; kingdom; phylum; no rank     |
| 315 | Eukaryota; Metazoa; Myxozoa; Tetracapsula                      | superkingdom; kingdom; phylum; genus       |
| 316 | Eukaryota; Metazoa; Myzostomida; Myzostoma                     | superkingdom; kingdom; family; genus       |
| 317 | Eukaryota; Metazoa; Myzostomida; Pulvinomyzostomum             | superkingdom; kingdom; family; genus       |
| 318 | Eukaryota; Metazoa; Nematoda; Chromadorea                      | superkingdom; kingdom; phylum; class       |
| 319 | Eukaryota; Metazoa; Nematoda; Enopla                           | superkingdom; kingdom; phylum; class       |
| 320 | Eukaryota; Metazoa; Nematomorpha; Gordioida                    | superkingdom; kingdom; phylum; class       |
| 321 | Eukaryota; Metazoa; Nemertea; Anopla                           | superkingdom; kingdom; phylum; class       |
| 322 | Eukaryota; Metazoa; Nemertea; Enopla                           | superkingdom; kingdom; phylum; class       |
| 323 | Eukaryota; Metazoa; Onychophora; Acanthokara                   | superkingdom; kingdom; phylum; genus       |
| 324 | Eukaryota; Metazoa; Onychophora; Peripatidae                   | superkingdom; kingdom; phylum; family      |
| 325 | Eukaryota; Metazoa; Onychophora; Peripatopsidae                | superkingdom; kingdom; phylum; family      |
| 326 | Eukaryota; Metazoa; Placozoa; Trichoplax                       | superkingdom; kingdom; phylum; genus       |
| 327 | Eukaryota; Metazoa; Platyhelminthes; Cestoda                   | superkingdom; kingdom; phylum; class       |
| 328 | Eukaryota; Metazoa; Platyhelminthes; Monogenea                 | superkingdom; kingdom; phylum; class       |
| 329 | Eukaryota; Metazoa; Platyhelminthes; Trematoda                 | superkingdom; kingdom; phylum; class       |
| 330 | Eukaryota; Metazoa; Platyhelminthes; Turbellaria               | superkingdom; kingdom; phylum; class       |
| 331 | Eukaryota; Metazoa; Pogonophora; Perviatia                     | superkingdom; kingdom; phylum; class       |
| 332 | Eukaryota; Metazoa; Pogonophora; Vestimentifera                | superkingdom; kingdom; phylum; class       |
| 333 | Eukaryota; Metazoa; Porifera; Calcarea                         | superkingdom; kingdom; phylum; class       |
| 334 | Eukaryota; Metazoa; Porifera; Demospongiae                     | superkingdom; kingdom; phylum; class       |
| 335 | Eukaryota; Metazoa; Porifera; Hexactinellida                   | superkingdom; kingdom; phylum; class       |
| 336 | Eukaryota; Metazoa; Priapulida; Priapulidae                    | superkingdom; kingdom; phylum; family      |
| 337 | Eukaryota; Metazoa; Rotifera; Bdelloidea                       | superkingdom; kingdom; phylum; class       |
| 338 | Eukaryota; Metazoa; Rotifera; Monogononta                      | superkingdom; kingdom; phylum; class       |
| 339 | Eukaryota; Metazoa; Rotifera; Seisonidea                       | superkingdom; kingdom; phylum; class       |
| 340 | Eukaryota; Metazoa; Sipuncula; Phascolosomatidea               | superkingdom; kingdom; phylum; class       |
| 341 | Eukaryota; Metazoa; Sipuncula; Sipunculidea                    | superkingdom; kingdom; phylum; class       |
| 342 | Eukaryota; Metazoa; Tardigrada; Eutardigrada                   | superkingdom; kingdom; phylum; class       |
| 343 | Eukaryota; Metazoa; Tardigrada; Heterotardigrada               | superkingdom; kingdom; phylum; class       |
| 344 | Eukaryota; Metazoa; Xenoturbellida; Xenoturbella               | superkingdom; kingdom; no rank; genus      |
| 345 | Eukaryota; Mycetozoa; Dictyosteliida; Acytostelium             | superkingdom; no rank; order; genus        |
| 346 | Eukaryota; Mycetozoa; Dictyosteliida; Dictyostelium            | superkingdom; no rank; order; genus        |
| 347 | Eukaryota; Mycetozoa; Dictyosteliida; Polysphondylium          | superkingdom; no rank; order; genus        |
| 348 | Eukaryota; Mycetozoa; Myxogastria; Myxogastromycetidae         | superkingdom; no rank; no rank; subclass   |
| 349 | Eukaryota; Mycetozoa; Myxogastria; Stemonitida                 | superkingdom; no rank; no rank; order      |
| 350 | Eukaryota; Mycetozoa; Myxogastria; Trichiida                   | superkingdom; no rank; no rank; order      |
| 351 | Eukaryota; Mycetozoa; Protostelida; Planoprotostelium          | superkingdom; no rank; no rank; genus      |
| 352 | Eukaryota; Oxymonadida; Pyrsonymphidae; Dinennypha             | superkingdom; order; family; genus         |
| 353 | Eukaryota; Oxymonadida; Pyrsonymphidae; Pyrsonympha            | superkingdom; order; family; genus         |
| 354 | Eukaryota; Oxymonadida; Streblosporangia; Streblosporangia     | superkingdom; order; family; genus         |
| 355 | Eukaryota; Parabasalidea; Hypermastigia; Spirotrichonymphida   | superkingdom; no rank; class; order        |
| 356 | Eukaryota; Parabasalidea; Hypermastigia; Trichonymphida        | superkingdom; no rank; class; order        |
| 357 | Eukaryota; Parabasalidea; Trichomonada; Trichomonadida         | superkingdom; no rank; class; order        |
| 358 | Eukaryota; Pelobiontida; Mastigamoebidae; Mastigamoeba         | superkingdom; no rank; family; genus       |
| 359 | Eukaryota; Pelobiontida; Pelomyxidae; Pelomyxa                 | superkingdom; no rank; family; genus       |
| 360 | Eukaryota; Plasmodiophorida; Plasmodiophoridae; Plasmodiophora | superkingdom; no rank; family; genus       |
| 361 | Eukaryota; Plasmodiophorida; Plasmodiophoridae; Polymyxa       | superkingdom; no rank; family; genus       |

|     |                                                                 |                                         |
|-----|-----------------------------------------------------------------|-----------------------------------------|
| 362 | Eukaryota; Plasmodiophorida; Plasmodiophoridae; Sorosphaera     | superkingdom; no rank; family; genus    |
| 363 | Eukaryota; Plasmodiophorida; Plasmodiophoridae; Spongospora     | superkingdom; no rank; family; genus    |
| 364 | Eukaryota; Polycystinea; Spumellaria; Sphaerozoizidae           | superkingdom; class; order; family      |
| 365 | Eukaryota; Polycystinea; Spumellaria; Thalassicollidae          | superkingdom; class; order; family      |
| 366 | Eukaryota; Rhodophyta; Bangiophyceae; Bangiales                 | superkingdom; no rank; class; order     |
| 367 | Eukaryota; Rhodophyta; Bangiophyceae; Cyanidiales               | superkingdom; no rank; class; order     |
| 368 | Eukaryota; Rhodophyta; Bangiophyceae; Erythropeltidales         | superkingdom; no rank; class; order     |
| 369 | Eukaryota; Rhodophyta; Bangiophyceae; Porphyridiales            | superkingdom; no rank; class; order     |
| 370 | Eukaryota; Rhodophyta; Bangiophyceae; Rhodochaetales            | superkingdom; no rank; class; order     |
| 371 | Eukaryota; Rhodophyta; Bangiophyceae; Stylonematales            | superkingdom; no rank; class; order     |
| 372 | Eukaryota; Rhodophyta; Florideophyceae; Acrochaetiales          | superkingdom; no rank; class; order     |
| 373 | Eukaryota; Rhodophyta; Florideophyceae; Ahnfeltiales            | superkingdom; no rank; class; order     |
| 374 | Eukaryota; Rhodophyta; Florideophyceae; Balbianiales            | superkingdom; no rank; class; order     |
| 375 | Eukaryota; Rhodophyta; Florideophyceae; Balliales               | superkingdom; no rank; class; order     |
| 376 | Eukaryota; Rhodophyta; Florideophyceae; Batrachospermales       | superkingdom; no rank; class; order     |
| 377 | Eukaryota; Rhodophyta; Florideophyceae; Bonnemaisoniales        | superkingdom; no rank; class; order     |
| 378 | Eukaryota; Rhodophyta; Florideophyceae; Ceramiales              | superkingdom; no rank; class; order     |
| 379 | Eukaryota; Rhodophyta; Florideophyceae; Corallinales            | superkingdom; no rank; class; order     |
| 380 | Eukaryota; Rhodophyta; Florideophyceae; Gelidiales              | superkingdom; no rank; class; order     |
| 381 | Eukaryota; Rhodophyta; Florideophyceae; Gigartinales            | superkingdom; no rank; class; order     |
| 382 | Eukaryota; Rhodophyta; Florideophyceae; Gracilariales           | superkingdom; no rank; class; order     |
| 383 | Eukaryota; Rhodophyta; Florideophyceae; Halymeniales            | superkingdom; no rank; class; order     |
| 384 | Eukaryota; Rhodophyta; Florideophyceae; Hildenbrandiales        | superkingdom; no rank; class; order     |
| 385 | Eukaryota; Rhodophyta; Florideophyceae; Nemaliales              | superkingdom; no rank; class; order     |
| 386 | Eukaryota; Rhodophyta; Florideophyceae; Nemastomatales          | superkingdom; no rank; class; order     |
| 387 | Eukaryota; Rhodophyta; Florideophyceae; Palmariales             | superkingdom; no rank; class; order     |
| 388 | Eukaryota; Rhodophyta; Florideophyceae; Plocamiales             | superkingdom; no rank; class; order     |
| 389 | Eukaryota; Rhodophyta; Florideophyceae; Rhodogorgonales         | superkingdom; no rank; class; order     |
| 390 | Eukaryota; Rhodophyta; Florideophyceae; Rhodymeniales           | superkingdom; no rank; class; order     |
| 391 | Eukaryota; Rhodophyta; Goniotrichales; Goniotricaceae           | superkingdom; no rank; order; family    |
| 392 | Eukaryota; Viridiplantae; Chlorophyta; Chlorophyceae            | superkingdom; kingdom; phylum; class    |
| 393 | Eukaryota; Viridiplantae; Chlorophyta; Oltmannsiellopsis        | superkingdom; kingdom; phylum; genus    |
| 394 | Eukaryota; Viridiplantae; Chlorophyta; Pedinophyceae            | superkingdom; kingdom; phylum; class    |
| 395 | Eukaryota; Viridiplantae; Chlorophyta; Picoocystophyceae        | superkingdom; kingdom; phylum; no rank  |
| 396 | Eukaryota; Viridiplantae; Chlorophyta; Prasinophyceae           | superkingdom; kingdom; phylum; class    |
| 397 | Eukaryota; Viridiplantae; Chlorophyta; Tetraedoron              | superkingdom; kingdom; phylum; genus    |
| 398 | Eukaryota; Viridiplantae; Chlorophyta; Trebouxiophyceae         | superkingdom; kingdom; phylum; class    |
| 399 | Eukaryota; Viridiplantae; Chlorophyta; Ulvophyceae              | superkingdom; kingdom; phylum; class    |
| 400 | Eukaryota; Viridiplantae; Streptophyta; Charales                | superkingdom; kingdom; phylum; order    |
| 401 | Eukaryota; Viridiplantae; Streptophyta; Chlorokybophyceae       | superkingdom; kingdom; phylum; class    |
| 402 | Eukaryota; Viridiplantae; Streptophyta; Coleochaetales          | superkingdom; kingdom; phylum; order    |
| 403 | Eukaryota; Viridiplantae; Streptophyta; Embryophyta             | superkingdom; kingdom; phylum; no rank  |
| 404 | Eukaryota; Viridiplantae; Streptophyta; Klebormidiophyceae      | superkingdom; kingdom; phylum; class    |
| 405 | Eukaryota; Viridiplantae; Streptophyta; Mesostigmatophyceae     | superkingdom; kingdom; phylum; class    |
| 406 | Eukaryota; Viridiplantae; Streptophyta; Zygnemophyceae          | superkingdom; kingdom; phylum; class    |
| 407 | Eukaryota; stramenopiles; Actinophryidae; Actinophrys           | superkingdom; no rank; class; genus     |
| 408 | Eukaryota; stramenopiles; Actinophryidae; Actinosphaerium       | superkingdom; no rank; class; genus     |
| 409 | Eukaryota; stramenopiles; Bacillariophyta; Bacillariophyceae    | superkingdom; no rank; phylum; class    |
| 410 | Eukaryota; stramenopiles; Bacillariophyta; Coscinodiscophyceae  | superkingdom; no rank; phylum; class    |
| 411 | Eukaryota; stramenopiles; Bacillariophyta; Fragilariophyceae    | superkingdom; no rank; phylum; class    |
| 412 | Eukaryota; stramenopiles; Bicosoecida; Cafeteriaeae             | superkingdom; no rank; order; family    |
| 413 | Eukaryota; stramenopiles; Bolidophyceae; Bolidomonas            | superkingdom; no rank; phylum; genus    |
| 414 | Eukaryota; stramenopiles; Chrysophyceae; Chromulinales          | superkingdom; no rank; class; order     |
| 415 | Eukaryota; stramenopiles; Chrysophyceae; Chrysolepidomonadaceae | superkingdom; no rank; class; family    |
| 416 | Eukaryota; stramenopiles; Chrysophyceae; Hibberdiales           | superkingdom; no rank; class; order     |
| 417 | Eukaryota; stramenopiles; Chrysophyceae; Ochromonadales         | superkingdom; no rank; class; order     |
| 418 | Eukaryota; stramenopiles; Chrysophyceae; Synurales              | superkingdom; no rank; class; order     |
| 419 | Eukaryota; stramenopiles; Dictyochophyceae; Dictyochales        | superkingdom; no rank; class; order     |
| 420 | Eukaryota; stramenopiles; Dictyochophyceae; Pedinellales        | superkingdom; no rank; class; order     |
| 421 | Eukaryota; stramenopiles; Dictyochophyceae; Rhizochromulina     | superkingdom; no rank; class; genus     |
| 422 | Eukaryota; stramenopiles; Eustigmatophyceae; Eustigmatos        | superkingdom; no rank; phylum; genus    |
| 423 | Eukaryota; stramenopiles; Eustigmatophyceae; Monodopsis         | superkingdom; no rank; phylum; genus    |
| 424 | Eukaryota; stramenopiles; Eustigmatophyceae; Nannochloropsis    | superkingdom; no rank; phylum; genus    |
| 425 | Eukaryota; stramenopiles; Eustigmatophyceae; Vischeria          | superkingdom; no rank; phylum; genus    |
| 426 | Eukaryota; stramenopiles; Hyphochytriomycetes; Hyphochytriaceae | superkingdom; no rank; class; family    |
| 427 | Eukaryota; stramenopiles; Labyrinthulida; Thraustochytriidae    | superkingdom; no rank; order; family    |
| 428 | Eukaryota; stramenopiles; Oomycetes; Lagenidiales               | superkingdom; no rank; no rank; order   |
| 429 | Eukaryota; stramenopiles; Oomycetes; Leptomitales               | superkingdom; no rank; no rank; order   |
| 430 | Eukaryota; stramenopiles; Oomycetes; Peronosporales             | superkingdom; no rank; no rank; order   |
| 431 | Eukaryota; stramenopiles; Oomycetes; Pythiales                  | superkingdom; no rank; no rank; order   |
| 432 | Eukaryota; stramenopiles; Oomycetes; Rhipidiales                | superkingdom; no rank; no rank; order   |
| 433 | Eukaryota; stramenopiles; Oomycetes; Saprolegniales             | superkingdom; no rank; no rank; no rank |
| 434 | Eukaryota; stramenopiles; Oomycetes; Sclerosporales             | superkingdom; no rank; no rank; order   |

|     |                                                                     |                                       |
|-----|---------------------------------------------------------------------|---------------------------------------|
| 435 | Eukaryota; stramenopiles; Pelagophyceae; Aureococcus                | superkingdom; no rank; class; genus   |
| 436 | Eukaryota; stramenopiles; Pelagophyceae; Aureoumbra                 | superkingdom; no rank; class; no rank |
| 437 | Eukaryota; stramenopiles; Pelagophyceae; Pelagomonadales            | superkingdom; no rank; class; no rank |
| 438 | Eukaryota; stramenopiles; Pelagophyceae; Sarcinochrysidales         | superkingdom; no rank; class; order   |
| 439 | Eukaryota; stramenopiles; Phaeophyceae; Asterocladon                | superkingdom; no rank; phylum; genus  |
| 440 | Eukaryota; stramenopiles; Phaeophyceae; Asteronema                  | superkingdom; no rank; phylum; genus  |
| 441 | Eukaryota; stramenopiles; Phaeophyceae; Bachelotia                  | superkingdom; no rank; phylum; genus  |
| 442 | Eukaryota; stramenopiles; Phaeophyceae; Cutleriales                 | superkingdom; no rank; phylum; order  |
| 443 | Eukaryota; stramenopiles; Phaeophyceae; Desmarestiales              | superkingdom; no rank; phylum; order  |
| 444 | Eukaryota; stramenopiles; Phaeophyceae; Dictyotales                 | superkingdom; no rank; phylum; order  |
| 445 | Eukaryota; stramenopiles; Phaeophyceae; Ectocarpales                | superkingdom; no rank; phylum; order  |
| 446 | Eukaryota; stramenopiles; Phaeophyceae; Fucales                     | superkingdom; no rank; phylum; order  |
| 447 | Eukaryota; stramenopiles; Phaeophyceae; Heterochordariaceae         | superkingdom; no rank; phylum; family |
| 448 | Eukaryota; stramenopiles; Phaeophyceae; Laminariales                | superkingdom; no rank; phylum; order  |
| 449 | Eukaryota; stramenopiles; Phaeophyceae; Neoleptonema                | superkingdom; no rank; phylum; genus  |
| 450 | Eukaryota; stramenopiles; Phaeophyceae; Ralfsiaceae                 | superkingdom; no rank; phylum; family |
| 451 | Eukaryota; stramenopiles; Phaeophyceae; Scytothamniales             | superkingdom; no rank; phylum; order  |
| 452 | Eukaryota; stramenopiles; Phaeophyceae; Sphacelariales              | superkingdom; no rank; phylum; order  |
| 453 | Eukaryota; stramenopiles; Phaeophyceae; Sporochnales                | superkingdom; no rank; phylum; order  |
| 454 | Eukaryota; stramenopiles; Phaeophyceae; Syringodermatales           | superkingdom; no rank; phylum; order  |
| 455 | Eukaryota; stramenopiles; Phaeophyceae; Tilopteridales              | superkingdom; no rank; phylum; order  |
| 456 | Eukaryota; stramenopiles; Phaeothamniophyceae; Phaeothamniales      | superkingdom; no rank; class; order   |
| 457 | Eukaryota; stramenopiles; Phaeothamniophyceae; Pleurochloridellales | superkingdom; no rank; class; order   |
| 458 | Eukaryota; stramenopiles; Pinguiophyceae; Glossomastix              | superkingdom; no rank; phylum; genus  |
| 459 | Eukaryota; stramenopiles; Pinguiophyceae; Pinguiochrysis            | superkingdom; no rank; phylum; genus  |
| 460 | Eukaryota; stramenopiles; Pinguiophyceae; Pinguiooccus              | superkingdom; no rank; phylum; genus  |
| 461 | Eukaryota; stramenopiles; Pinguiophyceae; Polypodochrysis           | superkingdom; no rank; phylum; genus  |
| 462 | Eukaryota; stramenopiles; Raphidophyceae; Chattonella               | superkingdom; no rank; class; genus   |
| 463 | Eukaryota; stramenopiles; Raphidophyceae; Heterosigma               | superkingdom; no rank; class; genus   |
| 464 | Eukaryota; stramenopiles; Raphidophyceae; Vacuolaria                | superkingdom; no rank; class; genus   |
| 465 | Eukaryota; stramenopiles; Xanthophyceae; Botrydiales                | superkingdom; no rank; phylum; order  |
| 466 | Eukaryota; stramenopiles; Xanthophyceae; Mischococcales             | superkingdom; no rank; phylum; order  |
| 467 | Eukaryota; stramenopiles; Xanthophyceae; Tribonematales             | superkingdom; no rank; phylum; order  |
| 468 | Eukaryota; stramenopiles; Xanthophyceae; Vaucheriales               | superkingdom; no rank; phylum; order  |
