# Supplementary material
Source: PubMed Central journal article supplement (PMC1838628)
Supplement: pnas_0611557104_4.pdf [file pnas_0611557104_4.pdf]

Table 3. Taxonomic rank at various taxonomic ranges

| Rank at 4th taxonomic range | Frequency |       |
|-----------------------------|-----------|-------|
| phylum                      | 2         | (2)   |
| subphylum                   | 12        | (11)  |
| superclass                  | 1         | (1)   |
| class                       | 67        | (57)  |
| subclass                    | 1         | (1)   |
| order                       | 149       | (126) |
| suborder                    | 2         | (1)   |
| family                      | 76        | (61)  |
| subfamily                   | 2         | (2)   |
| genus                       | 137       | (71)  |
| no rank                     | 19        | (12)  |
| sum                         | 468       | (345) |

| Rank at 3rd taxonomic range | Frequency |       |
|-----------------------------|-----------|-------|
| superphylum                 | 1         | (1)   |
| phylum                      | 45        | (41)  |
| class                       | 35        | (32)  |
| subclass                    | 3         | (3)   |
| order                       | 41        | (38)  |
| family                      | 15        | (7)   |
| no rank                     | 12        | (8)   |
| sum                         | 152       | (130) |

| Rank at 2nd taxonomic range | Frequency |      |
|-----------------------------|-----------|------|
| kingdom                     | 3         | (3)  |
| phylum                      | 24        | (23) |
| class                       | 7         | (7)  |
| order                       | 2         | (1)  |
| no rank                     | 12        | (10) |
| sum                         | 48        | (44) |

(the number in paranthesis indicated the number of ranks of which SSU rRNA sequences were available from the European ribosomal RNA database)
